# Supplementary material for: Heat Shock Transcription Factor 1 Localizes to Sex Chromatin during Meiotic Repression
Source: PubMed Central journal article supplement — J Biol Chem. 2010 Aug 27;285(45):34469–76. doi: 10.1074/jbc.M110.157552 (PMC2966061; doi:10.1074/jbc.m110.157552), 2010-08-27
Supplement: supp_M110.157552_Supplemental_data.pdf [file supp_M110.157552_Supplemental_data.pdf]

## SUPPLEMENTAL FIGURE LEGENDS

**Figure S1.** HSF1 is expressed from pachytene spermatocytes to early elongating spermatids, and localized to meiotic and post-meiotic sex chromatin. Localization of HSF1 (red) and  $\gamma$ H2AX (green) in stages of mouse seminiferous epithelium was detected from single confocal sections using immunofluorescence confocal microscopy. Hoechst is shown in blue, except in spermatid insets (**A-F e**, indicated with dashed line), where HSF1 (uppermost panel) or HSF1-Hoechst colocalization (middle panel) is superimposed on Hoechst shown in white. **A.** Cross section of a wild-type seminiferous tubule in stages XII-I, hallmarked by spermatocytes in the leptotene-pachytene transition (**a-b**), the meiotic divisions (**c-d**), and formation of haploid spermatids (**e**). **B.** Tubule from stages II-III with early pachytene spermatocytes (**a-d**) and round spermatids (**e**). **C.** A stage VI tubular section contains pachytene spermatocytes (**a-d**) and round spermatids (**e**). **D.** Stage VIII pachytene spermatocytes (**a-d**) and round spermatids (**e**). **E.** A section of seminiferous tubule in stage IX contains leptotene spermatocytes (**a-b**), late pachytene spermatocytes (**c-d**), and early elongating spermatids (**e**). **F.** Tubule in stages X-XI shows leptotene-zygotene spermatocytes (**a-b**), diplotene spermatocytes (**c-d**), and elongating spermatids (**e**). Stages are denoted by Roman numerals. Scale bar: 100  $\mu$ m (shown in **D**).

During male gametogenesis, HSF1 expression is not detected in the leptotene-pachytene transition in stage XII (**A a-b**), but, instead, HSF1 appears in early pachytene spermatocytes in stages II-III (**B a, c-d**). In pachytene spermatocytes, the silenced sex chromatin is retained in a  $\gamma$ H2AX-enriched sex body. Throughout the pachytene development, HSF1 localizes to the sex body, as indicated by HSF1- $\gamma$ H2AX colocalization (white) (**B-E**). In diplotene spermatocytes, HSF1 gradually disappears from the sex body (**F c-d**), and localizes to the surroundings of metaphase I and II chromosomes in stage XII (**A c-d**). HSF1 expression remains high through the meiotic divisions and round spermatid development (**A-D e**). After the meiotic divisions, HSF1 is not detected at the sex chromatin of spermatids in stage I (**A e**). The post-meiotic sex chromatin is visualized as a cloud-like structure next to the Hoechst-dense chromocenter, and is indicated by arrows in spermatid insets (**A-F e**). However, HSF1 relocalizes to sex chromatin in round spermatids in stages II-III (**B e**), and the localization to post-meiotic sex chromatin is detected during the development of round spermatids in stages II-VIII (**B-D e**). In early elongating spermatids, HSF1 levels rapidly decrease (**E**), even though HSF1 still is detected at the sex chromatin (**E e**). After stage IX, HSF1 is absent from elongating spermatids (**F e**).

**Figure S2.** The intensity of colocalization in both spermatocytes and round spermatids varies depending on which section of the 3D stack of confocal immunofluorescence images is shown. HSF1 staining (red) and  $\gamma$ H2AX staining (green) of WT testis sections were counterstained with Hoechst (blue). The colocalization of HSF1 and  $\gamma$ H2AX (white) was analyzed from six consecutive confocal sections. The main figure presents a single confocal section, whereas the insets show all the six confocal sections of the selected region. Stages are denoted by Roman numerals, and n indicates the section in the 3D stack. Scale bar: 100  $\mu$ m.

**Figure S3.** The specificity of the secondary antibodies that were used in colocalization analyses was confirmed by immunofluorescence confocal microscopy. Wild-type testis sections treated with primary antibody and its non-specific secondary antibody that was used in the same staining experiment for colocalization analysis. **A.** Secondary antibody for HSF1, Alexa568  $\alpha$ -rabbit antibody does not detect mouse monoclonal  $\gamma$ H2AX antibody. **B.** Secondary antibody for  $\gamma$ H2AX, Alexa488  $\alpha$ -mouse antibody does not detect rabbit polyclonal HSF1 antibody. Upper panels in A and B show images captured from the blue, green and red channels. The blue channel shows Hoechst-stained DNA, whereas no signal is detected from the green or the red channels. In lower panels, green and blue (left), and red and blue (right) are merged into a single image. Scale bar: 100  $\mu$ m.

## Supplemental Figure S1

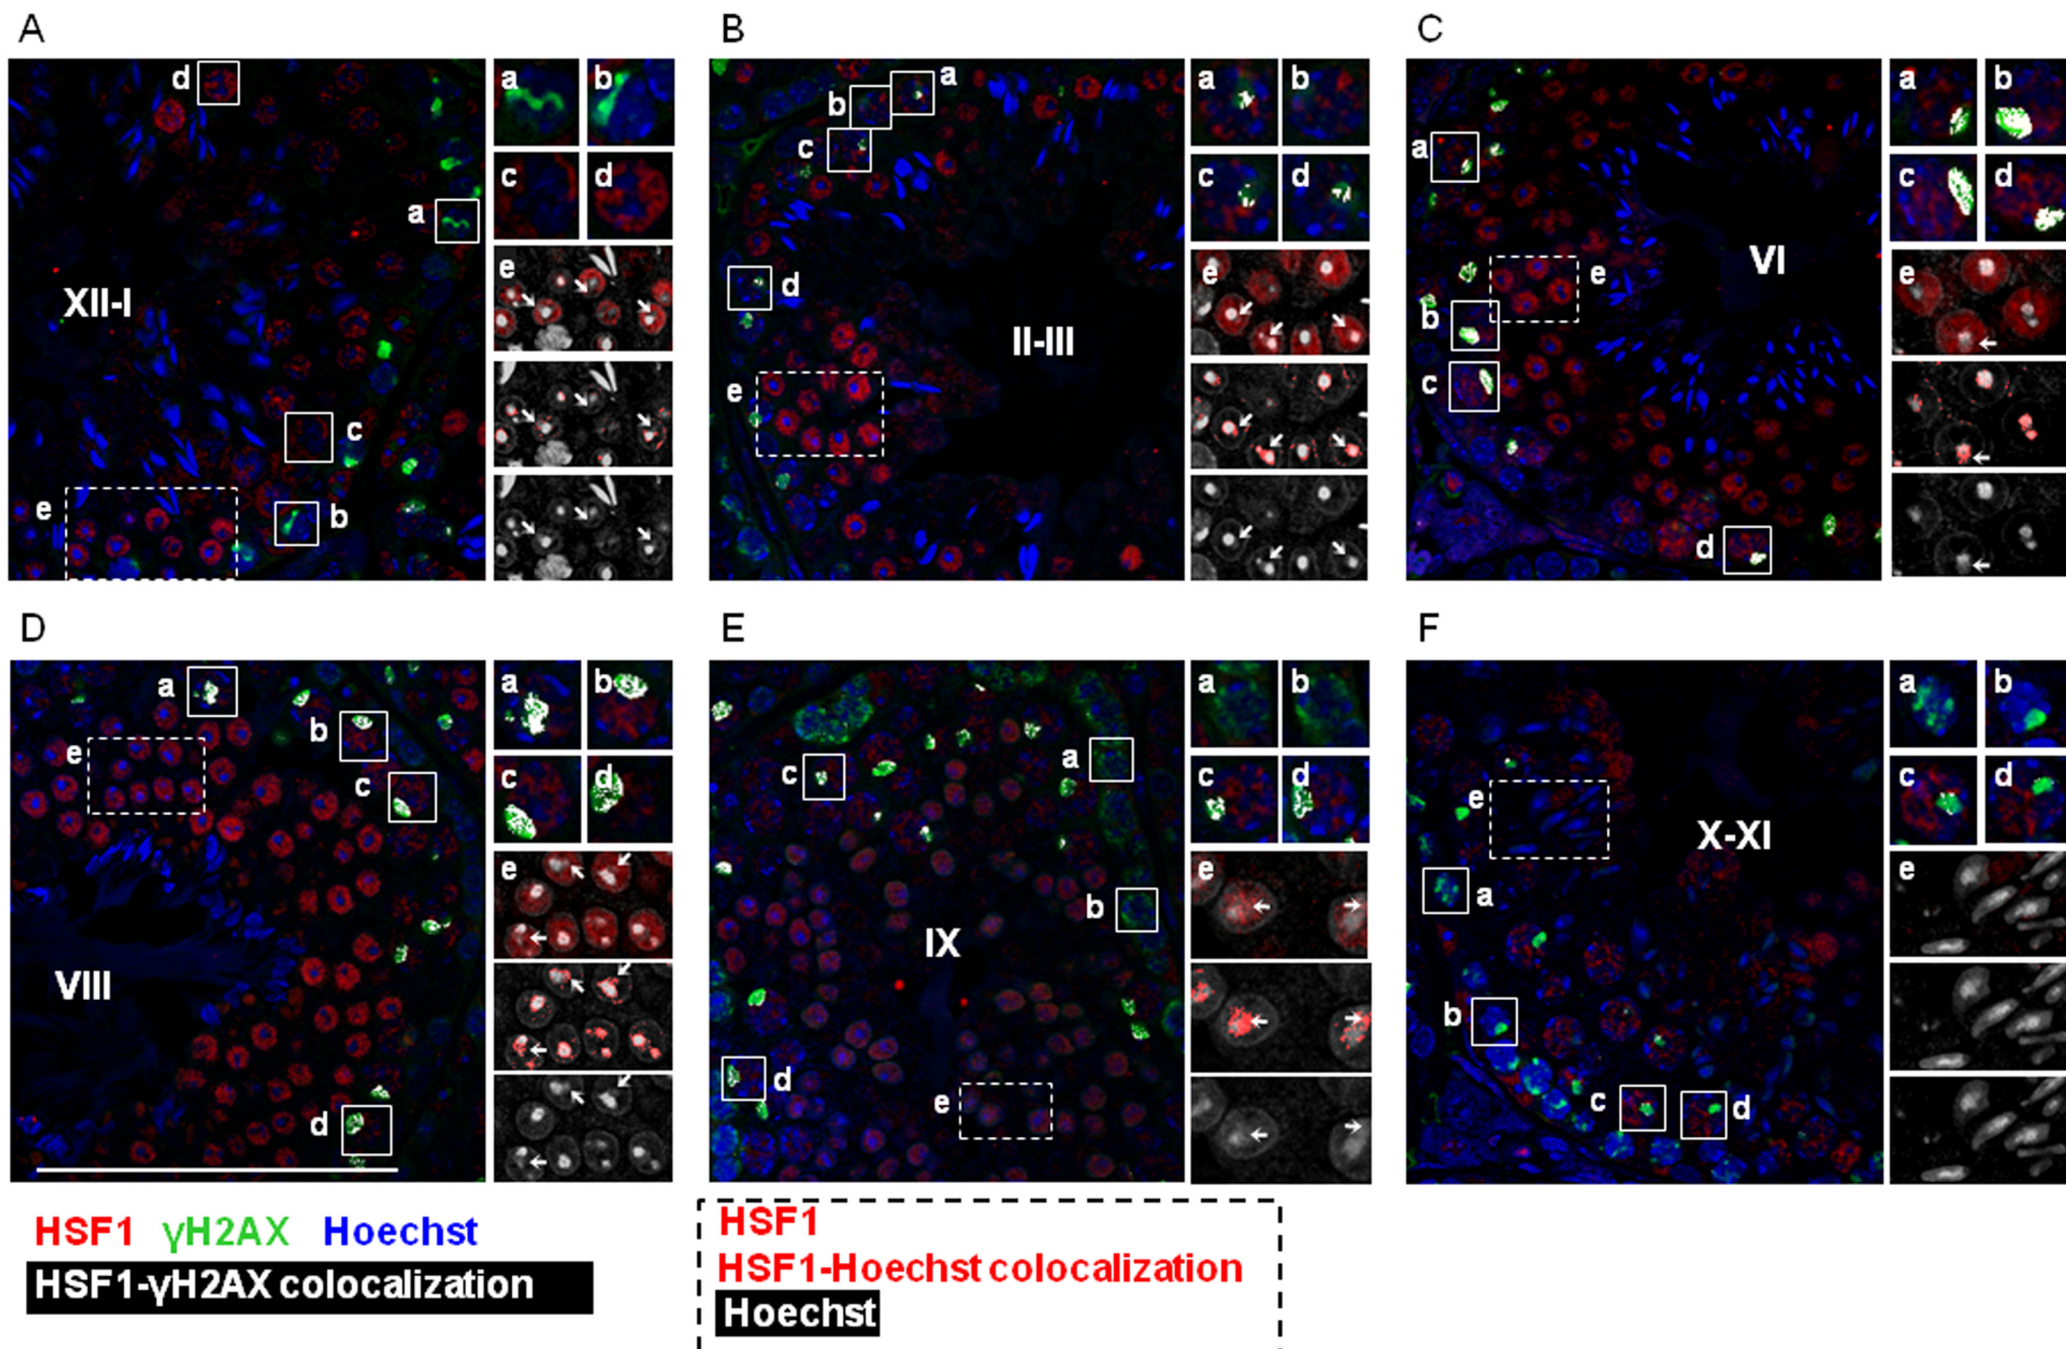

## Supplemental Figure S2

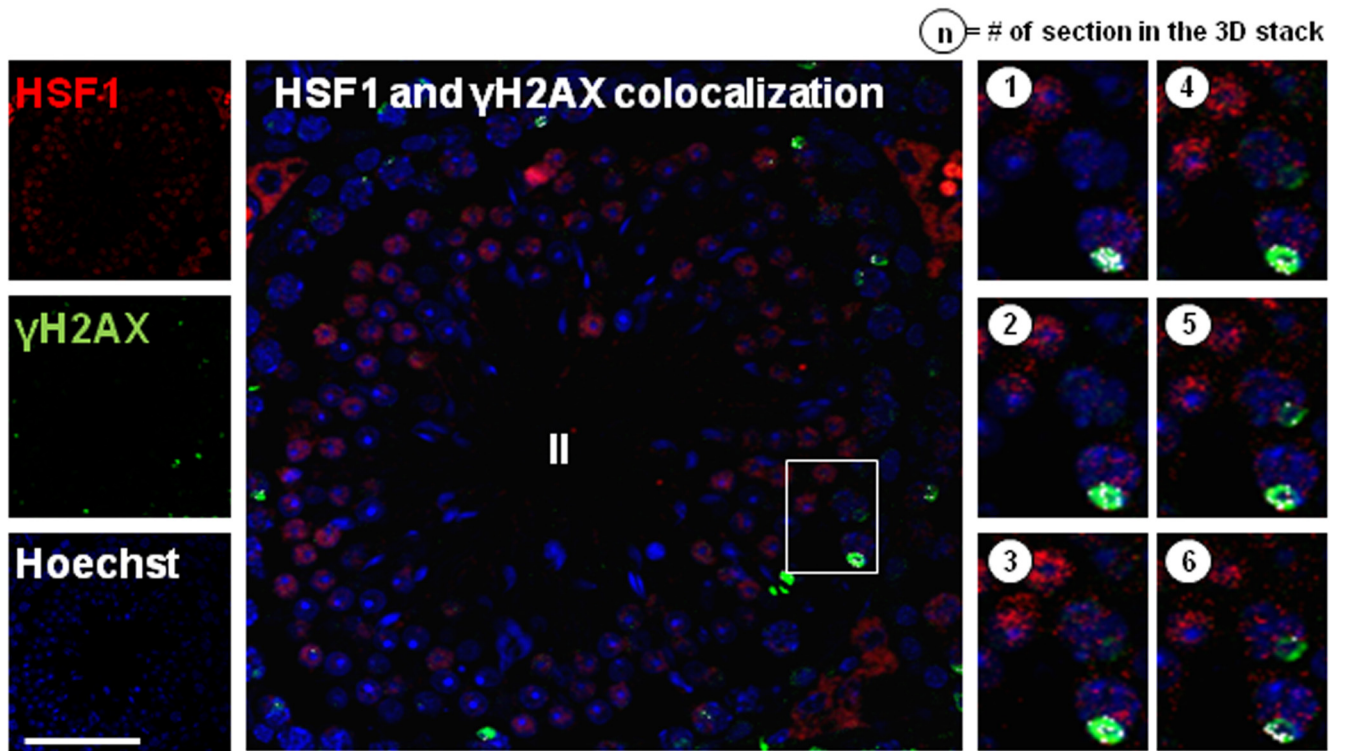

## Supplemental Figure S3

A

Antibody control:  $\alpha$ - $\gamma$ H2AX ( $\alpha$ -mouse) + Alexa568 ( $\alpha$ -rabbit)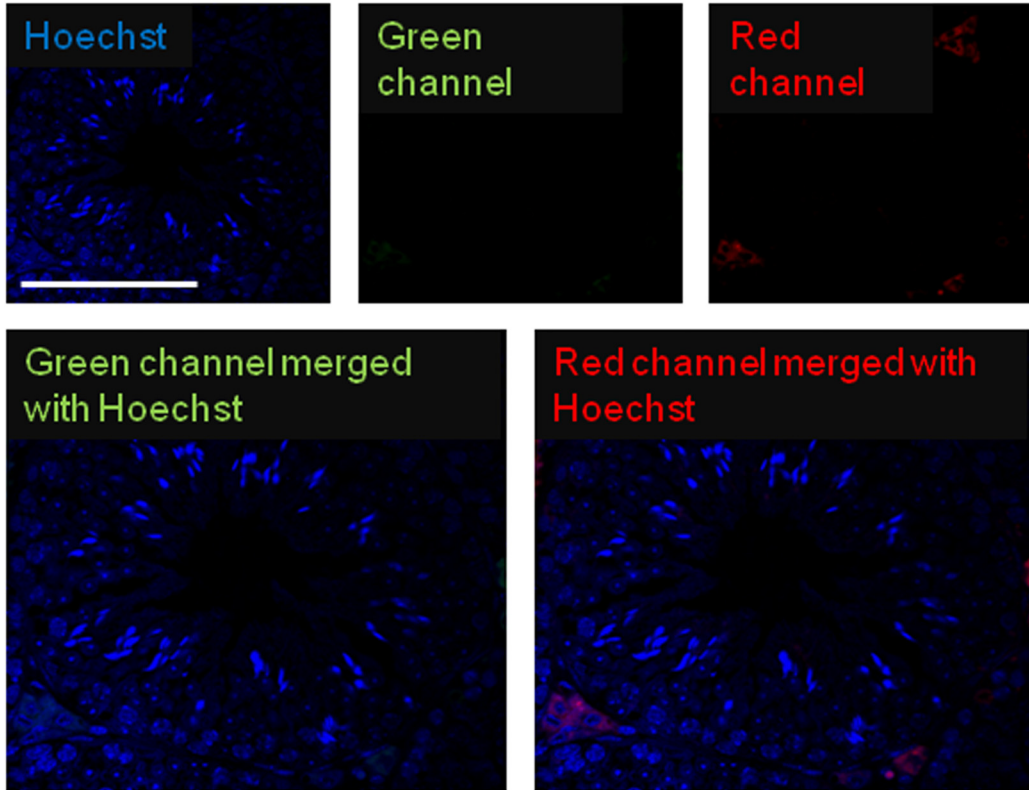

B

Antibody control:  $\alpha$ -HSF1 ( $\alpha$ -rabbit) + Alexa488 ( $\alpha$ -mouse)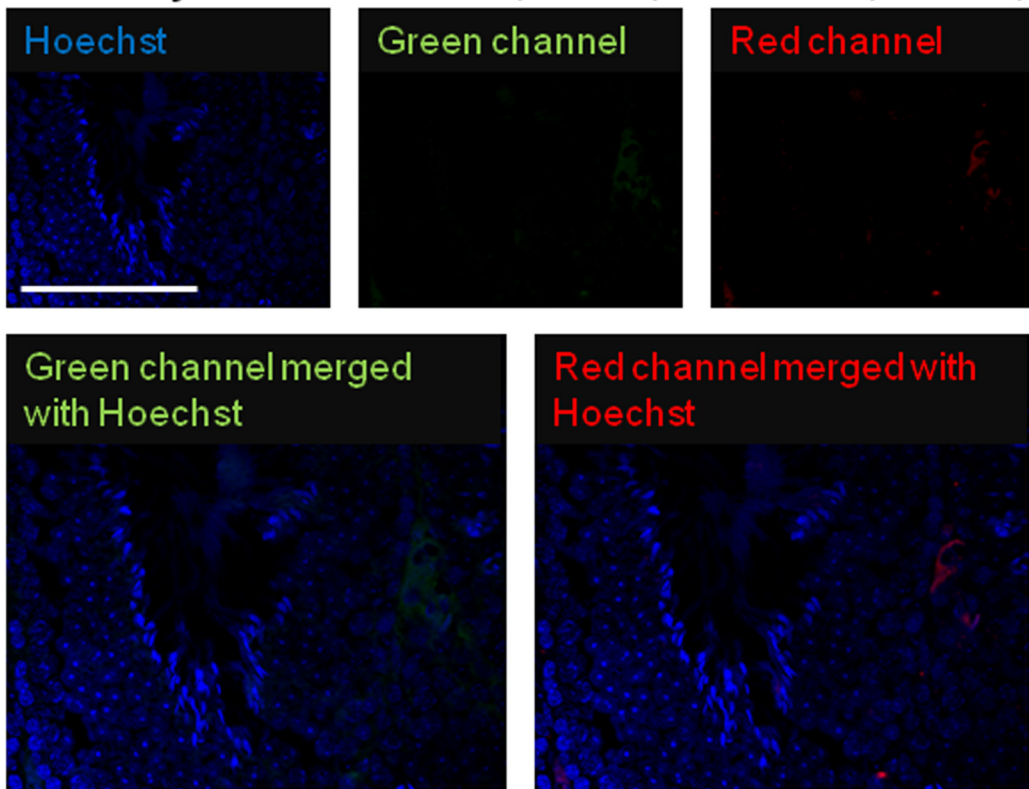

Supplemental table S1. Identified HSF1 target promoters.

| No. <sup>a</sup> | P-value <sup>b</sup> | Gene ID <sup>c</sup> | Abbreviation <sup>d</sup> | Gene name                                 | Chr. <sup>e</sup> |
|------------------|----------------------|----------------------|---------------------------|-------------------------------------------|-------------------|
| 1                | 0.0000               | U16671               | U16671                    | NA                                        | 6                 |
| 2                | 0.0000               | U16672               | L1Md-A1                   | L1 repeat, A subfamily, member 1          | 7                 |
| 3                | 0.0000               | NM_027802            | Obox1                     | oocyte specific homeobox 1                | 7                 |
| 4                | 0.0000               | AK046764             | B630019A10Rik             | RIKEN cDNA B630019A10 gene                | 16                |
| 5                | 0.0000               | NM_178875            | 8430426H19Rik             | RIKEN cDNA 8430426H19 gene                | 13                |
| 6                | 0.0000               | NM_001001499         | 4732465J04Rik             | RIKEN cDNA 4732465J04 gene                | 10                |
| 7                | 0.0000               | AK019664             | Ak7                       | adenylate kinase 7                        | 12                |
| 8                | 0.0000               | NM_146447            | Olfr1309                  | olfactory receptor 1309                   | 2                 |
| 9                | 0.0000               | AK045941             | L1Md-Tf29                 | L1 repeat, Tf subfamily, member 29        | NA                |
| 10               | 0.0000               | AK045941             | L1Md-Tf29                 | L1 repeat, Tf subfamily, member 29        | NA                |
| 11               | 0.0000               | U58494               | gag                       | NA                                        | 4                 |
| 12               | 0.0000               | NM_029891            | Nkrf                      | NF-kappaB repressing factor               | X                 |
| 13               | 0.0000               | AK045941             | L1Md-Tf29                 | L1 repeat, Tf subfamily, member 29        | NA                |
| 14               | 0.0000               | NM_146456            | Olfr92                    | olfactory receptor 92                     | 17                |
| 15               | 0.0000               | AK029501             | Efhc2                     | EF-hand domain (C-terminal) containing 2  | X                 |
| 16               | 0.0000               | AK086384             | 6330569M22Rik             | RIKEN cDNA 6330569M22 gene                | 3                 |
| 17               | 0.0000               | AK045941             | L1Md-Tf29                 | L1 repeat, Tf subfamily, member 29        | NA                |
| 18               | 0.0000               | AK053606             | Phf201                    | PHD finger protein 20-like 1              | 15                |
| 19               | 0.0000               | AK129217             | Nup155                    | nucleoporin 155                           | 15                |
| 20               | 0.0000               | U16671               | U16671                    | NA                                        | 18                |
| 21               | 0.0000               | AK031017             | Setd3                     | SET domain containing 3                   | 12                |
| 22               | 0.0000               | U16670               | U16670                    | NA                                        | 3                 |
| 23               | 0.0000               | U16672               | L1Md-A1                   | L1 repeat, A subfamily, member 1          | 7                 |
| 24               | 0.0000               | AK045941             | L1Md-Tf29                 | L1 repeat, Tf subfamily, member 29        | NA                |
| 25               | 0.0000               | AK122510             | Prei4                     | preimplantation protein 4                 | 2                 |
| 26               | 0.0000               | X16669               | LOC280487                 | pol polyprotein                           | 13                |
| 27               | 0.0000               | AB010349             | Zfp52                     | zinc finger protein 52                    | 17                |
| 28               | 0.0000               | AK048177             | Cnot1                     | CCR4-NOT transcription complex, subunit 1 | 8                 |
| 29               | 0.0000               | BC049349             | BC049349                  | cDNA sequence BC049349                    | 8                 |
| 30               | 0.0000               | U16672               | L1Md-A1                   | L1 repeat, A subfamily, member 1          | 7                 |
| 31               | 0.0000               | AK122272             | Fem1b                     | feminization 1 homolog b (C. elegans)     | 9                 |
| 32               | 0.0000               | AK129242             | Atg4b                     | autophagy-related 4B (yeast)              | 1                 |
| 33               | 0.0000               | NM_177912            | Gsdmc2                    | gasdermin C2                              | 15                |
| 34               | 0.0000               | U16670               | U16670                    | NA                                        | 7                 |
| 35               | 0.0000               | NM_201351            | Cybas3                    | cytochrome b, ascorbate dependent 3       | 19                |
| 36               | 0.0000               | BC057364             | EG210583                  | predicted gene, EG210583                  | 10                |
| 37               | 0.0000               | AY512920             | Mdn1                      | midasin homolog (yeast)                   | 4                 |
| 38               | 0.0000               | AK083524             | LOC280487                 | pol polyprotein                           | 13                |
| 39               | 0.0000               | AK045941             | L1Md-Tf29                 | L1 repeat, Tf subfamily, member 29        | NA                |
| 40               | 0.0000               | U16670               | U16670                    | NA                                        | 11                |
| 41               | 0.0000               | AK045941             | L1Md-Tf29                 | L1 repeat, Tf subfamily, member 29        | NA                |
| 42               | 0.0000               | AB010348             | Zfp52                     | zinc finger protein 52                    | 17                |
| 43               | 0.0000               | U16670               | U16670                    | NA                                        | 10                |
| 44               | 0.0000               | BC046438             | Brd9                      | bromodomain containing 9                  | 13                |
| 45               | 0.0000               | AK045941             | L1Md-Tf29                 | L1 repeat, Tf subfamily, member 29        | NA                |
| 46               | 0.0000               | AK045941             | L1Md-Tf29                 | L1 repeat, Tf subfamily, member 29        | NA                |
| 47               | 0.0000               | BC050871             | Bat2d                     | BAT2 domain containing 1                  | 1                 |
| 48               | 0.0000               | U16671               | U16671                    | NA                                        | 10                |

|    |        |           |               |                                                          |    |
|----|--------|-----------|---------------|----------------------------------------------------------|----|
| 49 | 0.0000 | BC044791  | Trip11        | thyroid hormone receptor interactor 11                   | 12 |
| 50 | 0.0000 | NM_177135 | D830030K20Rik | RIKEN cDNA D830030K20 gene                               | 14 |
| 51 | 0.0000 | AK081092  | AK081092      | NA                                                       | 5  |
| 52 | 0.0000 | AK040719  | Etold2        | ethanol decreased 2                                      | 13 |
| 53 | 0.0000 | AK033285  | E4f1          | E4F transcription factor 1                               | 17 |
| 54 | 0.0000 | NM_146678 | Olfr1428      | olfactory receptor 1428                                  | 19 |
| 55 | 0.0000 | AK122341  | Zc3h11a       | zinc finger CCCH type containing 11A                     | 1  |
| 56 | 0.0000 | AK082647  | AK082647      | NA                                                       | 2  |
| 57 | 0.0000 | AK052067  | AK052067      | predicted gene, ENSMUSG00000072700                       | 6  |
| 58 | 0.0000 | AK083524  | LOC280487     | pol polyprotein                                          | 13 |
| 59 | 0.0000 | AF039663  | Prom1         | prominin 1                                               | 5  |
| 60 | 0.0000 | NM_175490 | Gpr75         | G protein-coupled receptor 75                            | 11 |
| 61 | 0.0000 | AK003965  | Echdc1        | enoyl Coenzyme A hydratase domain containing 1           | 10 |
| 62 | 0.0000 | BC057932  | LOC629446     | gag protein                                              | 10 |
| 63 | 0.0000 | U16672    | L1Md-A1       | L1 repeat, A subfamily, member 1                         | 7  |
| 64 | 0.0000 | AK076428  | Pknox2        | Pbx/knotted 1 homeobox 2                                 | 9  |
| 65 | 0.0000 | AK018549  | Mapk1         | mitogen activated protein kinase 1                       | 16 |
| 66 | 0.0000 | NM_133789 | Strn4         | striatin, calmodulin binding protein 4                   | 7  |
| 67 | 0.0000 | NM_028866 | Wdr33         | WD repeat domain 33                                      | 18 |
| 68 | 0.0000 | NM_020022 | Rfc2          | replication factor C (activator 1) 2                     | 5  |
| 69 | 0.0000 | NM_183125 | A930006J02Rik | NA                                                       | 14 |
| 70 | 0.0000 | AK007800  | Erp27         | endoplasmic reticulum protein 27                         | 6  |
| 71 | 0.0000 | NM_008736 | Nrl           | neural retina leucine zipper gene                        | 14 |
| 72 | 0.0000 | AK048052  | AK048052      | NA                                                       | 13 |
| 73 | 0.0000 | AK048580  | EG665308      | predicted gene, EG665308                                 | 7  |
| 74 | 0.0001 | U16670    | U16670        | NA                                                       | 14 |
| 75 | 0.0001 | NM_029632 | Ppp1r11       | protein phosphatase 1, regulatory (inhibitor) 11         | 17 |
| 76 | 0.0001 | AB010312  | Zfp715        | zinc finger protein 715                                  | 7  |
| 77 | 0.0001 | M10062    | M10062        | NA                                                       | X  |
| 78 | 0.0001 | NM_194064 | Nanos2        | nanos homolog 2 (Drosophila)                             | 7  |
| 79 | 0.0001 | AK045941  | L1Md-Tf29     | L1 repeat, Tf subfamily, member 29                       | NA |
| 80 | 0.0001 | M38248    | LOC435023     | similar to spermiogenesis specific transcript on the Y 2 | Y  |
| 81 | 0.0001 | AK088735  | Rbm16         | RNA binding motif protein 16                             | 17 |
| 82 | 0.0001 | AK045941  | L1Md-Tf29     | L1 repeat, Tf subfamily, member 29                       | NA |
| 83 | 0.0001 | AY395631  | Gucy2g        | guanylate cyclase 2g                                     | 19 |
| 84 | 0.0001 | AK122407  | Dnajc16       | DnaJ (Hsp40) homolog, subfamily C, member 16             | 4  |
| 85 | 0.0001 | BC061245  | A230054D04Rik | RIKEN cDNA A230054D04 gene                               | 5  |
| 86 | 0.0001 | NM_176976 | 5830418K08Rik | RIKEN cDNA 5830418K08 gene                               | 9  |
| 87 | 0.0001 | BC030840  | Psmc5         | protease (prosome, macropain) 26S subunit, ATPase 5      | 11 |
| 88 | 0.0001 | U16672    | L1Md-A1       | L1 repeat, A subfamily, member 1                         | 7  |
| 89 | 0.0001 | NM_181751 | Gpr119        | G-protein coupled receptor 119                           | X  |
| 90 | 0.0001 | BC059027  | Mid1          | midline 1                                                | X  |
| 91 | 0.0001 | AK045941  | L1Md-Tf29     | L1 repeat, Tf subfamily, member 29                       | 17 |
| 92 | 0.0001 | NM_008373 | Il9           | interleukin 9                                            | 13 |
| 93 | 0.0001 | NM_198166 | Uts2d         | urotensin 2 domain containing                            | 16 |
| 94 | 0.0001 | AK032821  | Akap11        | A kinase (PRKA) anchor protein 11                        | 14 |
| 95 | 0.0001 | NM_147040 | Olfr1351      | olfactory receptor 1351                                  | 10 |
| 96 | 0.0001 | NM_177387 | Ust           | uronyl-2-sulfotransferase                                | 10 |
| 97 | 0.0001 | NM_025310 | Ftsj3         | FtsJ homolog 3 (E. coli)                                 | 11 |
| 98 | 0.0001 | AK034776  | Cnot1         | CCR4-NOT transcription complex, subunit 1                | 8  |
| 99 | 0.0001 | AK081719  | AK081719      | predicted gene, OTTMUSG00000013918                       | 1  |

|     |        |           |               |                                                           |    |
|-----|--------|-----------|---------------|-----------------------------------------------------------|----|
| 100 | 0.0001 | AB010338  | Zfp472        | zinc finger protein 472                                   | 17 |
| 101 | 0.0001 | AF193344  | Eif2ak4       | eukaryotic translation initiation factor 2 alpha kinase 4 | 2  |
| 102 | 0.0001 | AK045941  | L1Md-Tf29     | L1 repeat, Tf subfamily, member 29                        | 4  |
| 103 | 0.0001 | NM_027210 | Ceacam13      | CEA-related cell adhesion molecule 13                     | 7  |
| 104 | 0.0001 | AK045941  | L1Md-Tf29     | L1 repeat, Tf subfamily, member 29                        | 10 |
| 105 | 0.0001 | L04850    | Ssty2         | spermiogenesis specific transcript on the Y 2             | Y  |
| 106 | 0.0001 | M38248    | LOC435023     | similar to spermiogenesis specific transcript on the Y 2  | Y  |
| 107 | 0.0001 | NM_030742 | V1rd1         | vomer nasal 1 receptor, D1                                | 7  |
| 108 | 0.0001 | AK080098  | LOC675594     | similar to very large inducible GTPase 1 isoform A        | 7  |
| 109 | 0.0001 | L04850    | Ssty2         | spermiogenesis specific transcript on the Y 2             | Y  |
| 110 | 0.0001 | NM_177919 | Tceal5        | transcription elongation factor A (SII)-like 5            | X  |
| 111 | 0.0001 | AK048262  | AK048262      | NA                                                        | 8  |
| 112 | 0.0001 | AK045941  | L1Md-Tf29     | L1 repeat, Tf subfamily, member 29                        | NA |
| 113 | 0.0001 | NM_177314 | 5330439B14Rik | RIKEN cDNA 5330439B14 gene                                | 6  |
| 114 | 0.0001 | NM_007575 | Ciita         | class II transactivator                                   | 16 |
| 115 | 0.0001 | NM_183038 | Defb39        | defensin beta 39                                          | 8  |
| 116 | 0.0001 | AK053178  | Dnahc3        | dynein, axonemal, heavy chain 3                           | 7  |
| 117 | 0.0001 | U16671    | U16671        | NA                                                        | X  |
| 118 | 0.0001 | AK089333  | AK089333      | predicted gene, ENSMUSG00000070892                        | 4  |
| 119 | 0.0002 | AK045941  | L1Md-Tf29     | L1 repeat, Tf subfamily, member 29                        | 1  |
| 120 | 0.0001 | U16672    | L1Md-A1       | L1 repeat, A subfamily, member 1                          | 7  |
| 121 | 0.0002 | U16670    | U16670        | NA                                                        | 2  |
| 122 | 0.0001 | BC008537  | Zfp292        | zinc finger protein 292                                   | 4  |
| 123 | 0.0001 | AY512949  | AY512949      | predicted gene, ENSMUSG00000066088                        | 4  |
| 124 | 0.0002 | BC054358  | Sec31a        | SEC31 homolog A (S. cerevisiae)                           | 5  |
| 125 | 0.0002 | NM_146522 | OlfR854       | olfactory receptor 854                                    | 9  |
| 126 | 0.0002 | AK040149  | AK040149      | NA                                                        | 1  |
| 127 | 0.0002 | NM_207276 | Defb21        | defensin beta 21                                          | 2  |
| 128 | 0.0001 | NM_008146 | Golga3        | golgi autoantigen, golgin subfamily a, 3                  | 5  |
| 129 | 0.0002 | AK078916  | Ankhd1        | ankyrin repeat and KH domain containing 1                 | 18 |
| 130 | 0.0001 | NM_146389 | OlfR1350      | olfactory receptor 1350                                   | 7  |
| 131 | 0.0002 | AK045941  | L1Md-Tf29     | L1 repeat, Tf subfamily, member 29                        | NA |
| 132 | 0.0002 | AK003837  | B3galnt1      | UDP-GalNAc:b GlcNAc b 1,3-galactosaminyltransferase 1     | 3  |
| 133 | 0.0002 | AF247132  | AF247132      | NA                                                        | 3  |
| 134 | 0.0001 | AK122392  | Ankrd12       | ankyrin repeat domain 12                                  | 17 |
| 135 | 0.0002 | AK028762  | Senp1         | SUMO1/sentrin specific peptidase 1                        | 15 |
| 136 | 0.0002 | M38248    | LOC435023     | similar to spermiogenesis specific transcript on the Y 2  | Y  |
| 137 | 0.0002 | AK087250  | AK087250      | NA                                                        | 5  |
| 138 | 0.0002 | AK045941  | L1Md-Tf29     | L1 repeat, Tf subfamily, member 29                        | 18 |
| 139 | 0.0002 | NM_145541 | Rap1a         | RAS-related protein-1a                                    | 3  |
| 140 | 0.0002 | L04850    | Ssty2         | spermiogenesis specific transcript on the Y 2             | Y  |
| 141 | 0.0002 | L04850    | Ssty2         | spermiogenesis specific transcript on the Y 2             | Y  |
| 142 | 0.0002 | BC019710  | Phf3          | PHD finger protein 3                                      | 1  |
| 143 | 0.0002 | S64760    | Ugt1a1        | UDP glucuronosyltransferase 1 family, polypeptide A1      | 1  |
| 144 | 0.0002 | AK078821  | Qser1         | glutamine and serine rich 1                               | 2  |
| 145 | 0.0002 | AK014599  | Hyal4         | hyaluronoglucosaminidase 4                                | 6  |
| 146 | 0.0002 | M38248    | LOC435023     | similar to spermiogenesis specific transcript on the Y 2  | Y  |
| 147 | 0.0002 | NM_011618 | Tnnt1         | troponin T1, skeletal, slow                               | 7  |
| 148 | 0.0002 | AK046516  | AK046516      | predicted gene, ENSMUSG00000071543                        | 13 |
| 149 | 0.0002 | NM_176967 | A430072C10Rik | RIKEN cDNA A430072C10 gene                                | 3  |
| 150 | 0.0002 | AK045941  | L1Md-Tf29     | L1 repeat, Tf subfamily, member 29                        | NA |

|     |        |              |               |                                                          |    |
|-----|--------|--------------|---------------|----------------------------------------------------------|----|
| 151 | 0.0002 | L04850       | Ssty2         | spermiogenesis specific transcript on the Y 2            | Y  |
| 152 | 0.0002 | AK089867     | 9030025P20Rik | RIKEN cDNA 9030025P20 gene                               | 17 |
| 153 | 0.0002 | AK085862     | AK085862      | predicted gene, ENSMUSG00000054758                       | 10 |
| 154 | 0.0002 | AK045941     | L1Md-Tf29     | L1 repeat, Tf subfamily, member 29                       | NA |
| 155 | 0.0002 | NM_031167    | Il1rn         | interleukin 1 receptor antagonist                        | 2  |
| 156 | 0.0002 | U16672       | L1Md-A1       | L1 repeat, A subfamily, member 1                         | 7  |
| 157 | 0.0002 | BC060506     | Spag9         | sperm associated antigen 9                               | 11 |
| 158 | 0.0002 | U16672       | L1Md-A1       | L1 repeat, A subfamily, member 1                         | 7  |
| 159 | 0.0002 | NM_013621    | Olfr69        | olfactory receptor 69                                    | 7  |
| 160 | 0.0002 | AK054346     | Oog4          | oogenesis 4                                              | 4  |
| 161 | 0.0002 | AK007169     | 1700111E14Rik | RIKEN cDNA 1700111E14 gene                               | 6  |
| 162 | 0.0003 | M38248       | LOC435023     | similar to spermiogenesis specific transcript on the Y 2 | Y  |
| 163 | 0.0003 | L04850       | Ssty2         | spermiogenesis specific transcript on the Y 2            | Y  |
| 164 | 0.0003 | U16670       | U16670        | NA                                                       | 18 |
| 165 | 0.0003 | U16672       | L1Md-A1       | L1 repeat, A subfamily, member 1                         | 7  |
| 166 | 0.0003 | U16669       | U16669        | NA                                                       | 3  |
| 167 | 0.0003 | BC022960     | BC022960      | cDNA sequence BC022960                                   | X  |
| 168 | 0.0003 | AK005819     | Spata6        | spermatogenesis associated 6                             | 4  |
| 169 | 0.0003 | U16670       | U16670        | NA                                                       | Y  |
| 170 | 0.0003 | NM_172050    | Cd300e        | CD300e antigen                                           | 11 |
| 171 | 0.0003 | AY053456     | AY053456      | NA                                                       | 2  |
| 172 | 0.0003 | U16672       | L1Md-A1       | L1 repeat, A subfamily, member 1                         | 7  |
| 173 | 0.0003 | M38248       | LOC435023     | similar to spermiogenesis specific transcript on the Y 2 | Y  |
| 174 | 0.0003 | NM_010012    | Cyp8b1        | cytochrome P450, family 8, subfamily b, polypeptide 1    | 9  |
| 175 | 0.0003 | U16671       | U16671        | NA                                                       | 8  |
| 176 | 0.0003 | NM_199157    | Ifnk          | interferon kappa precursor                               | 4  |
| 177 | 0.0003 | U16670       | U16670        | NA                                                       | 3  |
| 178 | 0.0003 | AK045941     | L1Md-Tf29     | L1 repeat, Tf subfamily, member 29                       | NA |
| 179 | 0.0003 | NM_028562    | 1700080E11Rik | RIKEN cDNA 1700080E11 gene                               | 9  |
| 180 | 0.0003 | AK047412     | C2cd3         | C2 calcium-dependent domain containing 3                 | 7  |
| 181 | 0.0003 | AK011661     | Zfp318        | zinc finger protein 318                                  | 17 |
| 182 | 0.0003 | AK090300     | LOC667118     | similar to Zinc finger BED domain containing protein 4   | 1  |
| 183 | 0.0003 | U16670       | U16670        | NA                                                       | 11 |
| 184 | 0.0003 | BC058994     | Usp32         | ubiquitin specific peptidase 32                          | 11 |
| 185 | 0.0003 | AB093258     | Dnajc13       | DnaJ (Hsp40) homolog, subfamily C, member 13             | 9  |
| 186 | 0.0003 | AK045941     | L1Md-Tf29     | L1 repeat, Tf subfamily, member 29                       | NA |
| 187 | 0.0003 | BC068134     | Pftk1         | PFTAIRE protein kinase 1                                 | 5  |
| 188 | 0.0003 | NM_001004194 | Nlrp4e        | NLR family, pyrin domain containing 4E                   | 7  |
| 189 | 0.0003 | L04850       | Ssty2         | spermiogenesis specific transcript on the Y 2            | Y  |
| 190 | 0.0003 | BC059873     | Hmgcr         | 3-hydroxy-3-methylglutaryl-Coenzyme A reductase          | 13 |
| 191 | 0.0003 | M38248       | LOC435023     | similar to spermiogenesis specific transcript on the Y 2 | Y  |
| 192 | 0.0003 | NM_026375    | Ahctf1        | AT hook containing transcription factor 1                | 1  |
| 193 | 0.0003 | BC026492     | Ddx46         | DEAD (Asp-Glu-Ala-Asp) box polypeptide 46                | 13 |
| 194 | 0.0004 | AK045941     | L1Md-Tf29     | L1 repeat, Tf subfamily, member 29                       | 4  |
| 195 | 0.0004 | AK081351     | Gja7          | gap junction membrane channel protein alpha 7            | 11 |
| 196 | 0.0004 | AK045941     | L1Md-Tf29     | L1 repeat, Tf subfamily, member 29                       | NA |
| 197 | 0.0004 | NM_026287    | 4930470P17Rik | NA                                                       | 2  |
| 198 | 0.0004 | NM_016781    | Prkag1        | protein kinase, AMP-activated, gamma 1                   | 15 |
| 199 | 0.0004 | NM_013712    | Itgb1bp2      | integrin beta 1 binding protein 2                        | X  |
| 200 | 0.0004 | NM_147220    | Abca9         | ATP-binding cassette, sub-family A (ABC1) 9              | 11 |
| 201 | 0.0004 | NM_019873    | Fkbp1         | FK506 binding protein-like                               | 17 |



|     |        |              |               |                                                          |    |
|-----|--------|--------------|---------------|----------------------------------------------------------|----|
| 202 | 0.0004 | NM_009838    | Cct6a         | chaperonin subunit 6a (zeta)                             | 5  |
| 203 | 0.0004 | L04850       | Ssty2         | spermiogenesis specific transcript on the Y 2            | Y  |
| 204 | 0.0004 | AK039711     | 4930519F16Rik | RIKEN cDNA 4930519F16 gene                               | X  |
| 205 | 0.0004 | L04850       | Ssty2         | spermiogenesis specific transcript on the Y 2            | Y  |
| 206 | 0.0004 | U16670       | U16670        | NA                                                       | Y  |
| 207 | 0.0004 | AB010353     | Zkscan3       | zinc finger with KRAB and SCAN domains 3                 | 13 |
| 208 | 0.0004 | NM_001001738 | BC063749      | cDNA sequence BC063749                                   | 19 |
| 209 | 0.0004 | NM_027720    | 4933434M16Rik | NA                                                       | 11 |
| 210 | 0.0004 | AK004886     | Nucb1         | nucleobindin 1                                           | 7  |
| 211 | 0.0004 | NM_017399    | Fabp1         | fatty acid binding protein 1, liver                      | 6  |
| 212 | 0.0004 | AK045941     | L1Md-Tf29     | L1 repeat, Tf subfamily, member 29                       | 12 |
| 213 | 0.0005 | AK084868     | AK084868      | NA                                                       | 9  |
| 214 | 0.0005 | NM_080846    | Higd1b        | HIG1 domain family, member 1B                            | 11 |
| 215 | 0.0005 | M38248       | LOC435023     | similar to spermiogenesis specific transcript on the Y 2 | Y  |
| 216 | 0.0005 | AK034990     | Myef2         | myelin basic protein expression factor 2, repressor      | 2  |
| 217 | 0.0005 | AK034679     | Ash1l         | ash1 (absent, small, or homeotic)-like (Drosophila)      | 3  |
| 218 | 0.0005 | AJ250693     | Zranb1        | zinc finger, RAN-binding domain containing 1             | 7  |
| 219 | 0.0005 | AK032464     | AK032464      | NA                                                       | 2  |
| 220 | 0.0005 | AB010329     | Zfp715        | zinc finger protein 715                                  | 7  |
| 221 | 0.0005 | U16672       | L1Md-A1       | L1 repeat, A subfamily, member 1                         | 7  |
| 222 | 0.0005 | BC053524     | lpo7          | importin 7                                               | 7  |
| 223 | 0.0005 | L04850       | Ssty2         | spermiogenesis specific transcript on the Y 2            | Y  |
| 224 | 0.0005 | AK045941     | L1Md-Tf29     | L1 repeat, Tf subfamily, member 29                       | NA |
| 225 | 0.0005 | L04850       | Ssty2         | spermiogenesis specific transcript on the Y 2            | Y  |
| 226 | 0.0005 | NM_177246    | B230220B15Rik | NA                                                       | NA |
| 227 | 0.0005 | NM_026335    | Lce1h         | late cornified envelope 1H                               | 3  |
| 228 | 0.0005 | BC023805     | BC023805      | predicted gene, OTTMUSG00000015730                       | 2  |
| 229 | 0.0005 | NM_177200    | Svopl         | SV2 related protein homolog (rat)-like                   | 6  |
| 230 | 0.0005 | NM_177749    | Kir3dl1       | killer cell immunoglobulin-like receptor 1               | X  |
| 231 | 0.0005 | AK045941     | L1Md-Tf29     | L1 repeat, Tf subfamily, member 29                       | X  |
| 232 | 0.0005 | U16670       | U16670        | NA                                                       | Y  |
| 233 | 0.0005 | NM_020008    | Clec7a        | C-type lectin domain family 7, member a                  | 6  |
| 234 | 0.0005 | AK046292     | Ndufa10       | NADH dehydrogenase (ubiquinone) 1 alpha 10               | 1  |
| 235 | 0.0005 | BC002292     | Gbbp1l1       | GC-rich promoter binding protein 1-like 1                | 4  |
| 236 | 0.0005 | AK047634     | AK047634      | predicted gene, ENSMUSG00000058736                       | 5  |
| 237 | 0.0005 | U16670       | U16670        | NA                                                       | 2  |
| 238 | 0.0005 | U16672       | L1Md-A1       | L1 repeat, A subfamily, member 1                         | 7  |
| 239 | 0.0005 | BC030900     | Ece2          | endothelin converting enzyme 2                           | 16 |
| 240 | 0.0005 | U16672       | L1Md-A1       | L1 repeat, A subfamily, member 1                         | 7  |
| 241 | 0.0005 | S57425       | lpr           | NA                                                       | 15 |
| 242 | 0.0006 | AK045941     | L1Md-Tf29     | L1 repeat, Tf subfamily, member 29                       | NA |
| 243 | 0.0006 | AK016545     | 4932434E15Rik | RIKEN cDNA 4932434E15 gene                               | 2  |
| 244 | 0.0006 | U58494       | gag           | NA                                                       | 10 |
| 245 | 0.0006 | NM_013697    | Ttr           | transthyretin                                            | 18 |
| 246 | 0.0006 | L04850       | Ssty2         | spermiogenesis specific transcript on the Y 2            | Y  |
| 247 | 0.0006 | AK014580     | 4632415L05Rik | RIKEN cDNA 4632415L05 gene                               | 3  |
| 248 | 0.0006 | M38248       | LOC435023     | similar to spermiogenesis specific transcript on the Y 2 | Y  |
| 249 | 0.0006 | AK129453     | Spg11         | spastic paraplegia 11                                    | 2  |
| 250 | 0.0006 | NM_008817    | Peg3          | paternally expressed 3                                   | 7  |
| 251 | 0.0006 | M38248       | LOC435023     | similar to spermiogenesis specific transcript on the Y 2 | Y  |
| 252 | 0.0006 | NM_010188    | Fcgr3         | Fc receptor, IgG, low affinity III                       | 1  |

|     |        |           |               |                                                          |    |
|-----|--------|-----------|---------------|----------------------------------------------------------|----|
| 253 | 0.0006 | NM_146511 | Olfr107       | olfactory receptor 107                                   | 17 |
| 254 | 0.0006 | M38248    | LOC435023     | similar to spermiogenesis specific transcript on the Y 2 | Y  |
| 255 | 0.0006 | U16670    | U16670        | NA                                                       | 13 |
| 256 | 0.0006 | U16672    | L1Md-A1       | L1 repeat, A subfamily, member 1                         | 7  |
| 257 | 0.0006 | NM_172629 | 9430028L06Rik | NA                                                       | 18 |
| 258 | 0.0006 | AK088735  | Rbm16         | RNA binding motif protein 16                             | 17 |
| 259 | 0.0006 | U16670    | U16670        | NA                                                       | Y  |
| 260 | 0.0006 | AK045941  | L1Md-Tf29     | L1 repeat, Tf subfamily, member 29                       | NA |
| 261 | 0.0007 | AK046660  | Recql         | RecQ protein-like                                        | 6  |
| 262 | 0.0006 | AK039976  | A630038E17Rik | RIKEN cDNA A630038E17 gene                               | 14 |
| 263 | 0.0007 | U16670    | U16670        | NA                                                       | 2  |
| 264 | 0.0007 | NM_007378 | Abca4         | ATP-binding cassette, sub-family A (ABC1) 4              | 3  |
| 265 | 0.0007 | BC031496  | Rnaset2a      | ribonuclease T2A                                         | 17 |
| 266 | 0.0007 | U16670    | U16670        | NA                                                       | 3  |
| 267 | 0.0007 | AK017442  | Krtap2-4      | keratin associated protein 2-4                           | 11 |
| 268 | 0.0007 | L04850    | Ssty2         | spermiogenesis specific transcript on the Y 2            | Y  |
| 269 | 0.0007 | BC002035  | Igk-V1        | immunoglobulin kappa chain variable 1 (V1)               | 6  |
| 270 | 0.0007 | NM_177246 | B230220B15Rik | NA                                                       | 13 |
| 271 | 0.0007 | AK122406  | Zdhhc17       | zinc finger, DHHC domain containing 17                   | 10 |
| 272 | 0.0007 | U16670    | U16670        | NA                                                       | NA |
| 273 | 0.0007 | AK030146  | Cdc2l6        | cell division cycle 2-like 6 (CDK8-like)                 | 10 |
| 274 | 0.0007 | BC057072  | Zfp407        | zinc finger protein 407                                  | 18 |
| 275 | 0.0007 | NM_177135 | D830030K20Rik | RIKEN cDNA D830030K20 gene                               | 14 |
| 276 | 0.0008 | BC048563  | 1700034E13Rik | RIKEN cDNA 1700034E13 gene                               | 18 |
| 277 | 0.0008 | AK037017  | Adpgk         | ADP-dependent glucokinase                                | 9  |
| 278 | 0.0008 | AK045941  | L1Md-Tf29     | L1 repeat, Tf subfamily, member 29                       | NA |
| 279 | 0.0008 | NM_177172 | A830054O04Rik | NA                                                       | 10 |
| 280 | 0.0008 | BC006717  | Ccpg1         | cell cycle progression 1                                 | 9  |
| 281 | 0.0008 | AK045941  | L1Md-Tf29     | L1 repeat, Tf subfamily, member 29                       | NA |
| 282 | 0.0008 | NM_213616 | Atp2b4        | ATPase, Ca <sup>++</sup> transporting, plasma membrane 4 | 1  |
| 283 | 0.0008 | NM_207651 | Slc14a2       | solute carrier family 14 (urea transporter) 2            | 18 |
| 284 | 0.0008 | NM_011036 | Pap           | pancreatitis-associated protein                          | 6  |
| 285 | 0.0008 | U16672    | L1Md-A1       | L1 repeat, A subfamily, member 1                         | 7  |
| 286 | 0.0008 | BC046559  | 4930485B16Rik | RIKEN cDNA 4930485B16 gene                               | 10 |
| 287 | 0.0008 | NM_011867 | Slc26a4       | solute carrier family 26, member 4                       | 12 |
| 288 | 0.0008 | NM_172602 | A630038E17Rik | NA                                                       | 14 |
| 289 | 0.0009 | U16672    | L1Md-A1       | L1 repeat, A subfamily, member 1                         | 7  |
| 290 | 0.0008 | AB010344  | Zfp26         | zinc finger protein 26                                   | 9  |
| 291 | 0.0009 | NM_029343 | Spata9        | spermatogenesis associated 9                             | 13 |
| 292 | 0.0009 | BC061169  | Slx           | Sycp3 like X-linked, ENSMUSG00000073257                  | X  |
| 293 | 0.0009 | AK045823  | D930020B18Rik | RIKEN cDNA D930020B18 gene                               | 10 |
| 294 | 0.0009 | AK044340  | Als2cr2       | amyotrophic lateral sclerosis 2 chromosome region 2      | 1  |
| 295 | 0.0009 | AB010343  | AB010343      | predicted gene, ENSMUSG00000063905                       | 13 |
| 296 | 0.0009 | AK129457  | 1500001A10Rik | RIKEN cDNA 1500001A10 gene                               | 5  |
| 297 | 0.0009 | AK012781  | Rps17         | ribosomal protein S17                                    | 7  |
| 298 | 0.0009 | AK007150  | 1700109H08Rik | RIKEN cDNA 1700109H08 gene                               | 5  |
| 299 | 0.0009 | NM_026352 | Ppid          | peptidylprolyl isomerase D (cyclophilin D)               | 3  |
| 300 | 0.0009 | BC059060  | 4933409K07Rik | RIKEN cDNA 4933409K07 gene                               | 4  |
| 301 | 0.0009 | NM_177202 | A930104D05Rik | RIKEN cDNA A930104D05 gene                               | 2  |
| 302 | 0.0009 | AK047105  | LOC433577     | similar to ORF7                                          | 3  |
| 303 | 0.0009 | BC061206  | Cpa4          | carboxypeptidase A4                                      | 6  |

|     |        |           |               |                                                          |    |
|-----|--------|-----------|---------------|----------------------------------------------------------|----|
| 304 | 0.0009 | NM_025782 | 9130422G05Rik | NA                                                       | 4  |
| 305 | 0.0009 | NM_177197 | Idi2          | isopentenyl-diphosphate delta isomerase 2                | 13 |
| 306 | 0.0009 | NM_025308 | 1810007E14Rik | RIKEN cDNA 1810007E14 gene                               | 2  |
| 307 | 0.0009 | NM_133200 | P2ry14        | purinergic receptor P2Y, G-protein coupled, 14           | 3  |
| 308 | 0.001  | NM_146486 | Olf203        | olfactory receptor 203                                   | 16 |
| 309 | 0.001  | AB093242  | Ubr4          | ubiquitin protein ligase E3 component n-recognin 4       | 4  |
| 310 | 0.001  | NM_029738 | Cluap1        | clusterin associated protein 1                           | 16 |
| 311 | 0.001  | NM_026743 | Tspan11       | tetraspanin 11                                           | 6  |
| 312 | 0.001  | AK042615  | 4930590J08Rik | RIKEN cDNA 4930590J08 gene                               | 6  |
| 313 | 0.001  | AK045941  | L1Md-Tf29     | L1 repeat, Tf subfamily, member 29                       | NA |
| 314 | 0.001  | U16670    | U16670        | NA                                                       | X  |
| 315 | 0.001  | AK032405  | 6030443O07Rik | RIKEN cDNA 6030443O07 gene                               | 19 |
| 316 | 0.001  | U16670    | U16670        | NA                                                       | 2  |
| 317 | 0.001  | U16672    | L1Md-A1       | L1 repeat, A subfamily, member 1                         | 7  |
| 318 | 0.001  | AK038266  | Rwdd4a        | RWD domain containing 4A                                 | 8  |
| 319 | 0.001  | AK006601  | 1700034K16Rik | RIKEN cDNA 1700034K16 gene                               | 4  |
| 320 | 0.001  | NM_146385 | Olf1347       | olfactory receptor 1347                                  | 7  |
| 321 | 0.001  | AK005957  | 4932442K08Rik | RIKEN cDNA 4932442K08 gene                               | 17 |
| 322 | 0.001  | NM_026596 | 4930591A17Rik | RIKEN cDNA 4930591A17 gene                               | 2  |
| 323 | 0.001  | AK045941  | L1Md-Tf29     | L1 repeat, Tf subfamily, member 29                       | NA |
| 324 | 0.0011 | NM_007964 | Evi5          | ecotropic viral integration site 5                       | 5  |
| 325 | 0.0011 | NM_177335 | D930020B18Rik | RIKEN cDNA D930020B18 gene                               | 10 |
| 326 | 0.0011 | NM_026386 | Snx2          | sorting nexin 2                                          | 18 |
| 327 | 0.0011 | U16670    | U16670        | NA                                                       | NA |
| 328 | 0.0011 | BC049753  | Cst8          | cystatin 8 (cystatin-related epididymal spermatogenic)   | 2  |
| 329 | 0.0011 | NM_175490 | Gpr75         | G protein-coupled receptor 75                            | 11 |
| 330 | 0.0011 | AK036870  | Nck1          | non-catalytic region of tyrosine kinase adaptor 1        | 9  |
| 331 | 0.0011 | M38247    | Ssty2         | spermiogenesis specific transcript on the Y 2            | Y  |
| 332 | 0.0011 | AK034491  | AK034491      | NA                                                       | 9  |
| 333 | 0.0011 | AK039283  | Hspa4l        | heat shock protein 4 like                                | 3  |
| 334 | 0.0011 | AK045941  | L1Md-Tf29     | L1 repeat, Tf subfamily, member 29                       | NA |
| 335 | 0.0011 | NM_176829 | 4931440F15Rik | RIKEN cDNA 4931440F15 gene                               | 11 |
| 336 | 0.0011 | AK028672  | AK028672      | NA                                                       | 7  |
| 337 | 0.0011 | AK032065  | 6330569M22Rik | RIKEN cDNA 6330569M22 gene                               | 3  |
| 338 | 0.0011 | AK044553  | Gpr75         | G protein-coupled receptor 75                            | 11 |
| 339 | 0.0011 | NM_028344 | 2810449C13Rik | NA                                                       | 4  |
| 340 | 0.0011 | AK045231  | 2610209M04Rik | RIKEN cDNA 2610209M04 gene                               | 6  |
| 341 | 0.0011 | U76209    | Neurod4       | neurogenic differentiation 4                             | 10 |
| 342 | 0.0011 | M38248    | LOC435023     | similar to spermiogenesis specific transcript on the Y 2 | Y  |
| 343 | 0.0011 | BC051401  | Dnahc3        | dynein, axonemal, heavy chain 3                          | 7  |
| 344 | 0.0011 | AK032783  | Rnf144a       | ring finger protein 144A                                 | 12 |
| 345 | 0.0011 | AK009750  | Vps13b        | vacuolar protein sorting 13B (yeast)                     | 15 |
| 346 | 0.0011 | AK008703  | Pik3r4        | phosphatidylinositol 3 kinase, regulatory, polypeptide 4 | 9  |
| 347 | 0.0012 | AK082708  | AK082708      | predicted gene, ENSMUSG00000053270                       | 11 |
| 348 | 0.0012 | AK045941  | L1Md-Tf29     | L1 repeat, Tf subfamily, member 29                       | NA |
| 349 | 0.0012 | BC028451  | Aggf1         | angiogenic factor with G patch and FHA domains 1         | 13 |
| 350 | 0.0012 | AK078951  | Mia3          | melanoma inhibitory activity 3                           | 1  |
| 351 | 0.0012 | AK051815  | C330023M02Rik | RIKEN cDNA C330023M02 gene                               | 5  |
| 352 | 0.0012 | K01411    | Ifna2         | interferon alpha 2                                       | 4  |
| 353 | 0.0012 | AK014534  | Pwwp2a        | PWWP domain containing 2A                                | 11 |
| 354 | 0.0012 | AK014500  | Dync2h1       | dynein cytoplasmic 2 heavy chain 1                       | 9  |

|     |        |           |               |                                                          |    |
|-----|--------|-----------|---------------|----------------------------------------------------------|----|
| 355 | 0.0012 | X53654    | Pou2f2        | POU domain, class 2, transcription factor 2              | 7  |
| 356 | 0.0012 | AK079363  | Tial1         | Tia1 cytotoxic granule-associated RNA binding like 1     | 7  |
| 357 | 0.0012 | AK029693  | Rnf17         | ring finger protein 17                                   | 14 |
| 358 | 0.0012 | BC021423  | Zdhhc14       | zinc finger, DHHC domain containing 14                   | 17 |
| 359 | 0.0012 | M38248    | LOC435023     | similar to spermiogenesis specific transcript on the Y 2 | Y  |
| 360 | 0.0012 | NM_028739 | 4933404G15Rik | NA                                                       | 16 |
| 361 | 0.0012 | NM_177686 | Clec12a       | C-type lectin domain family 12, member a                 | 6  |
| 362 | 0.0012 | U16670    | U16670        | NA                                                       | 5  |
| 363 | 0.0012 | U16672    | L1Md-A1       | L1 repeat, A subfamily, member 1                         | 7  |
| 364 | 0.0012 | AK050921  | Pwwp2a        | PWWP domain containing 2A                                | 11 |
| 365 | 0.0013 | NM_173761 | Ythdf1        | YTH domain family 1                                      | 2  |
| 366 | 0.0013 | AK044162  | D130059P03Rik | RIKEN cDNA D130059P03 gene                               | 6  |
| 367 | 0.0013 | AF102539  | Olf60         | olfactory receptor 60                                    | 7  |
| 368 | 0.0013 | NM_010170 | F2r12         | coagulation factor II (thrombin) receptor-like 2         | 13 |
| 369 | 0.0013 | AK044167  | AU042671      | expressed sequence AU042671                              | 5  |
| 370 | 0.0013 | NM_028535 | 1700049E17Rik | NA                                                       | NA |
| 371 | 0.0013 | AY140895  | AY140895      | NA                                                       | NA |
| 372 | 0.0013 | NM_177765 | Ttll13        | tubulin tyrosine ligase-like family, member 13           | 7  |
| 373 | 0.0013 | U16672    | L1Md-A1       | L1 repeat, A subfamily, member 1                         | 7  |
| 374 | 0.0013 | AK033338  | Mll3          | myeloid/lymphoid or mixed-lineage leukemia 3             | 5  |
| 375 | 0.0013 | AK012399  | 2700049A03Rik | RIKEN cDNA 2700049A03 gene                               | 12 |
| 376 | 0.0013 | AK045941  | L1Md-Tf29     | L1 repeat, Tf subfamily, member 29                       | NA |
| 377 | 0.0013 | AK082287  | Eml5          | echinoderm microtubule associated protein like 5         | 12 |
| 378 | 0.0014 | AK007247  | D0H6S2654E    | DNA segment, human D6S2654E                              | 13 |
| 379 | 0.0014 | U16670    | U16670        | NA                                                       | X  |
| 380 | 0.0014 | NM_028818 | 2610511M17Rik | NA                                                       | 7  |
| 381 | 0.0014 | NM_145935 | Glyat         | glycine-N-acyltransferase                                | 19 |
| 382 | 0.0014 | NM_030739 | V1rd4         | vomer nasal 1 receptor, D4                               | 7  |
| 383 | 0.0014 | NM_183166 | EG233164      | predicted gene, EG233164                                 | 7  |
| 384 | 0.0014 | AK053272  | AK053272      | NA                                                       | 9  |
| 385 | 0.0014 | AK010057  | Hn1           | hematological and neurological expressed 1               | 11 |
| 386 | 0.0014 | NM_176965 | Efcab5        | EF-hand calcium binding domain 5                         | 11 |
| 387 | 0.0014 | NM_018884 | Pdzrn3        | PDZ domain containing RING finger 3                      | 6  |
| 388 | 0.0014 | AK049564  | Lims1         | LIM and senescent cell antigen-like domains 1            | 10 |
| 389 | 0.0014 | NM_009258 | Spink3        | serine peptidase inhibitor, Kazal type 3                 | 18 |
| 390 | 0.0014 | AK037652  | Wdr22         | WD repeat domain 22                                      | 12 |
| 391 | 0.0015 | NM_011294 | Sub1          | SUB1 homolog (S. cerevisiae)                             | 15 |
| 392 | 0.0015 | NM_207162 | LOC382133     | similar to RIKEN cDNA 1700029H17                         | Y  |
| 393 | 0.0015 | AK017750  | Casc5         | cancer susceptibility candidate 5                        | 2  |
| 394 | 0.0015 | NM_172867 | Zfp462        | zinc finger protein 462                                  | 4  |
| 395 | 0.0015 | AK005786  | 1700008P02Rik | RIKEN cDNA 1700008P02 gene                               | 3  |
| 396 | 0.0015 | AB010352  | AB010352      | predicted gene, ENSMUSG00000070586                       | 5  |
| 397 | 0.0015 | NM_205795 | Mrgprb4       | MAS-related GPR, member B4                               | 7  |
| 398 | 0.0015 | BC056637  | Lgr4          | leucine-rich repeat-G protein-coupled receptor 4         | 2  |
| 399 | 0.0015 | NM_201637 | Chd8          | chromodomain helicase DNA binding protein 8              | 14 |
| 400 | 0.0015 | AK008287  | Polr2k        | polymerase (RNA) II (DNA directed) polypeptide K         | 15 |
| 401 | 0.0015 | AK050901  | Ep400         | E1A binding protein p400                                 | 5  |
| 402 | 0.0015 | NM_028535 | 1700049E17Rik | NA                                                       | NA |
| 403 | 0.0015 | NM_153102 | Zfp352        | zinc finger protein 352                                  | 4  |
| 404 | 0.0015 | BC034550  | Dyrk1a        | dual-specificity Y-phosphorylation regulated kinase 1a   | 16 |
| 405 | 0.0015 | NM_007977 | F8            | coagulation factor VIII                                  | X  |

|     |        |           |               |                                                     |    |
|-----|--------|-----------|---------------|-----------------------------------------------------|----|
| 406 | 0.0015 | AK039283  | Hspa4l        | heat shock protein 4 like                           | 3  |
| 407 | 0.0016 | NM_176975 | A430010J10Rik | RIKEN cDNA A430010J10 gene                          | 6  |
| 408 | 0.0016 | AK047604  | Dlgap4        | discs, large homolog-associated protein 4           | 2  |
| 409 | 0.0016 | X59289    | Xist          | inactive X specific transcripts                     | X  |
| 410 | 0.0016 | M55219    | M55219        | NA                                                  | NA |
| 411 | 0.0016 | S57425    | lpr           | NA                                                  | Y  |
| 412 | 0.0016 | AK045941  | L1Md-Tf29     | L1 repeat, Tf subfamily, member 29                  | NA |
| 413 | 0.0016 | BC065123  | Baz1a         | bromodomain adjacent to zinc finger domain 1A       | 12 |
| 414 | 0.0016 | U22058    | Adam4         | a disintegrin and metallopeptidase domain 4         | 12 |
| 415 | 0.0017 | BC052528  | Rbbp6         | retinoblastoma binding protein 6                    | 7  |
| 416 | 0.0017 | AF302090  | Trim69        | tripartite motif-containing 69                      | 2  |
| 417 | 0.0017 | BC026926  | C87436        | expressed sequence C87436                           | 6  |
| 418 | 0.0017 | AK086113  | Hcfc2         | host cell factor C2                                 | 10 |
| 419 | 0.0016 | NM_008223 | Serpind1      | serine (or cysteine) peptidase inhibitor, clade D 1 | 16 |
| 420 | 0.0017 | AF132218  | Hrc           | histidine rich calcium binding protein              | 7  |
| 421 | 0.0017 | BC026868  | Slc39a14      | solute carrier family 39 (zinc transporter) 14      | 14 |
| 422 | 0.0017 | AY196960  | Mageb2        | melanoma antigen, family B, 2                       | X  |
| 423 | 0.0017 | AK082130  | Gatc          | glutamyl-tRNA(Gln) amidotransferase C               | 5  |
| 424 | 0.0017 | AK037168  | Gm312         | gene model 312, (NCBI)                              | 16 |
| 425 | 0.0017 | AK045941  | L1Md-Tf29     | L1 repeat, Tf subfamily, member 29                  | NA |
| 426 | 0.0017 | U16670    | U16670        | NA                                                  | NA |
| 427 | 0.0018 | BC018264  | Pip           | prolactin induced protein                           | 6  |
| 428 | 0.0018 | AK084863  | AK084863      | NA                                                  | 16 |
| 429 | 0.0017 | AK034060  | AK034060      | predicted gene, ENSMUSG00000053892                  | X  |
| 430 | 0.0018 | L04851    | Ssty2         | spermiogenesis specific transcript on the Y 2       | Y  |
| 431 | 0.0018 | BC006724  | Icmt          | isoprenylcysteine carboxyl methyltransferase        | 4  |
| 432 | 0.0018 | AK045941  | L1Md-Tf29     | L1 repeat, Tf subfamily, member 29                  | NA |
| 433 | 0.0018 | NM_025738 | Cypt6         | cysteine-rich perinuclear theca 6                   | X  |
| 434 | 0.0018 | AK045941  | L1Md-Tf29     | L1 repeat, Tf subfamily, member 29                  | NA |
| 435 | 0.0018 | NM_009220 | Ssty1         | spermiogenesis specific transcript on the Y 1       | Y  |
| 436 | 0.0018 | NM_134253 | Bnipl         | BCL2/adenovirus E1B 19kD interacting protein like   | 3  |
| 437 | 0.0018 | AK045941  | L1Md-Tf29     | L1 repeat, Tf subfamily, member 29                  | 7  |
| 438 | 0.0018 | BC025610  | Ttc5          | tetratricopeptide repeat domain 5                   | 14 |
| 439 | 0.0018 | AK035076  | AK035076      | NA                                                  | 2  |
| 440 | 0.0019 | BC027360  | Ipo8          | importin 8                                          | 6  |
| 441 | 0.0018 | U16670    | U16670        | NA                                                  | 2  |
| 442 | 0.0018 | NM_019917 | Vmn2r26       | vomer nasal 2, receptor 26                          | 6  |
| 443 | 0.0019 | AK042135  | AK042135      | predicted gene, OTTMUSG00000000469                  | 13 |
| 444 | 0.0019 | AK085040  | Ddx51         | DEAD (Asp-Glu-Ala-Asp) box polypeptide 51           | 5  |
| 445 | 0.0019 | U16671    | U16671        | NA                                                  | 16 |
| 446 | 0.0019 | BC042516  | Prdm4         | PR domain containing 4                              | 10 |
| 447 | 0.0019 | AB010347  | 2810426N06Rik | RIKEN cDNA 2810426N06 gene                          | 7  |
| 448 | 0.0019 | AK088963  | AK088963      | predicted gene, ENSMUSG00000073624                  | 18 |
| 449 | 0.0019 | AK129307  | Cnot6         | CCR4-NOT transcription complex, subunit 6           | 11 |
| 450 | 0.0019 | BC027668  | Bcl2l15       | Bcl2-like 15                                        | 3  |
| 451 | 0.0019 | U16672    | L1Md-A1       | L1 repeat, A subfamily, member 1                    | 7  |
| 452 | 0.0019 | AK045941  | L1Md-Tf29     | L1 repeat, Tf subfamily, member 29                  | NA |
| 453 | 0.0019 | L04850    | Ssty2         | spermiogenesis specific transcript on the Y 2       | Y  |
| 454 | 0.0019 | AK033517  | Evi1          | ecotropic viral integration site 1                  | 3  |
| 455 | 0.0019 | NM_147004 | Olf399        | olfactory receptor 399                              | 11 |
| 456 | 0.0019 | AK018524  | Twsg1         | twisted gastrulation homolog 1 (Drosophila)         | 17 |

|     |        |           |               |                                                                |    |
|-----|--------|-----------|---------------|----------------------------------------------------------------|----|
| 457 | 0.0019 | NM_009529 | Slx           | Sycp3 like X-linked, ENSMUSG00000073257                        | X  |
| 458 | 0.002  | BC002302  | Rbm16         | RNA binding motif protein 16                                   | 17 |
| 459 | 0.002  | NM_008042 | Fprl1         | formyl peptide receptor-like 1                                 | 17 |
| 460 | 0.002  | NM_009596 | Abpa          | androgen binding protein alpha                                 | 7  |
| 461 | 0.002  | NM_025847 | 2610016F04Rik | NA                                                             | 14 |
| 462 | 0.002  | AF298661  | Mepe          | matrix extracellular phosphoglycoprotein ASARM                 | 5  |
| 463 | 0.002  | BC029053  | Cab39         | calcium binding protein 39                                     | 1  |
| 464 | 0.002  | NM_010898 | Nf2           | neurofibromatosis 2                                            | 11 |
| 465 | 0.002  | NM_146382 | Olfr461       | olfactory receptor 461                                         | 6  |
| 466 | 0.002  | AB010367  | Zfp420        | zinc finger protein 420                                        | 7  |
| 467 | 0.002  | BC026738  | 3110043O21Rik | RIKEN cDNA 3110043O21 gene                                     | 4  |
| 468 | 0.002  | NM_178396 | Car12         | carbonic anyhydrase 12                                         | 9  |
| 469 | 0.0021 | NM_025844 | Chordc1       | cysteine and histidine-rich domain (CHORD) 1                   | 9  |
| 470 | 0.0021 | AB010345  | Zfp26         | zinc finger protein 26                                         | 9  |
| 471 | 0.002  | BC010304  | BC010304      | cDNA sequence BC010304                                         | 13 |
| 472 | 0.0021 | NM_207547 | V1rd21        | vomer nasal 1 receptor, D21                                    | 7  |
| 473 | 0.0021 | NM_011730 | Slc6a18       | NA                                                             | 13 |
| 474 | 0.002  | AK045941  | L1Md-Tf29     | L1 repeat, Tf subfamily, member 29                             | NA |
| 475 | 0.0021 | U16672    | L1Md-A1       | L1 repeat, A subfamily, member 1                               | 7  |
| 476 | 0.0021 | NM_011468 | Sprr2a        | small proline-rich protein 2A                                  | 3  |
| 477 | 0.0021 | NM_027561 | 4632415L05Rik | NA                                                             | 3  |
| 478 | 0.0021 | AK082921  | Pkn2          | protein kinase N2                                              | 3  |
| 479 | 0.0021 | NM_177135 | D830030K20Rik | RIKEN cDNA D830030K20 gene                                     | 14 |
| 480 | 0.0021 | AK033990  | Slc30a9       | solute carrier family 30 (zinc transporter) 9                  | 5  |
| 481 | 0.0021 | AY297108  | Gje1          | gap junction membrane channel epsilon 1                        | 5  |
| 482 | 0.0022 | NM_198961 | Vmn2r43       | vomer nasal 2, receptor 43                                     | 7  |
| 483 | 0.0022 | NM_010694 | Lcn3          | lipocalin 3                                                    | 2  |
| 484 | 0.0022 | U16670    | U16670        | NA                                                             | 5  |
| 485 | 0.0022 | U16672    | L1Md-A1       | L1 repeat, A subfamily, member 1                               | 7  |
| 486 | 0.0022 | BC044668  | LOC72520      | hypothetical gene LOC72520                                     | 2  |
| 487 | 0.0022 | AK019507  | Csnk2a2       | casein kinase 2, alpha prime polypeptide                       | 8  |
| 488 | 0.0022 | AK078303  | Fem1b         | feminization 1 homolog b (C. elegans)                          | 9  |
| 489 | 0.0022 | AK045941  | L1Md-Tf29     | L1 repeat, Tf subfamily, member 29                             | NA |
| 490 | 0.0022 | AY364010  | Nlrp12        | NLR family, pyrin domain containing 12                         | 7  |
| 491 | 0.0022 | NM_008334 | Ifna7         | interferon alpha 7                                             | 4  |
| 492 | 0.0022 | NM_170777 | Elof1         | elongation factor 1 homolog                                    | 9  |
| 493 | 0.0022 | NM_183280 | RP23-438H3.2  | hypothetical protein LOC69357                                  | X  |
| 494 | 0.0022 | NM_008118 | Gif           | gastric intrinsic factor                                       | 19 |
| 495 | 0.0022 | NM_146956 | Olfr525       | olfactory receptor 525                                         | 7  |
| 496 | 0.0022 | AK011082  | Trim10        | tripartite motif protein 10                                    | 17 |
| 497 | 0.0023 | NM_010904 | Nefh          | neurofilament, heavy polypeptide                               | 11 |
| 498 | 0.0023 | AK005786  | 1700008P02Rik | RIKEN cDNA 1700008P02 gene                                     | 3  |
| 499 | 0.0023 | AK028858  | Pbxip1        | pre-B-cell leukemia transcription factor interacting protein 1 | 3  |
| 500 | 0.0023 | NM_029948 | Pramef12      | PRAME family member 12                                         | 4  |
| 501 | 0.0024 | NM_133771 | Memo1         | mediator of cell motility 1                                    | 17 |
| 502 | 0.0024 | M92418    | Stfa2         | stefin A2                                                      | 16 |
| 503 | 0.0024 | NM_007970 | Ezh1          | enhancer of zeste homolog 1 (Drosophila)                       | 11 |
| 504 | 0.0024 | NM_146588 | Olfr1030      | olfactory receptor 1030                                        | 2  |
| 505 | 0.0024 | AB010313  | Zfp157        | zinc finger protein 157                                        | 5  |
| 506 | 0.0024 | AK078033  | Utp18         | UTP18, small subunit (SSU) processome component                | 11 |
| 507 | 0.0024 | BC049586  | LOC382133     | similar to RIKEN cDNA 1700029H17                               | Y  |

|     |        |           |               |                                                              |    |
|-----|--------|-----------|---------------|--------------------------------------------------------------|----|
| 508 | 0.0024 | AK087111  | Zfyve9        | zinc finger, FYVE domain containing 9                        | 4  |
| 509 | 0.0024 | AK083645  | AK083645      | NA                                                           | 7  |
| 510 | 0.0024 | NM_008039 | Fpr-rs2       | formyl peptide receptor, related sequence 2                  | 17 |
| 511 | 0.0025 | AK036630  | Slc35b4       | solute carrier family 35, member B4                          | 6  |
| 512 | 0.0024 | AK045941  | L1Md-Tf29     | L1 repeat, Tf subfamily, member 29                           | NA |
| 513 | 0.0025 | AK033683  | Daam1         | dishevelled associated activator of morphogenesis 1          | 12 |
| 514 | 0.0025 | NM_025940 | NM_025940     | predicted gene, ENSMUSG00000063277                           | 14 |
| 515 | 0.0025 | NM_177890 | EG330513      | predicted gene, EG330513                                     | 7  |
| 516 | 0.0025 | M38248    | LOC435023     | similar to spermiogenesis specific transcript on the Y 2     | Y  |
| 517 | 0.0025 | NM_011539 | Tbxas1        | thromboxane A synthase 1, platelet                           | 6  |
| 518 | 0.0025 | M64429    | B-raf         | NA                                                           | 6  |
| 519 | 0.0025 | U16672    | L1Md-A1       | L1 repeat, A subfamily, member 1                             | 7  |
| 520 | 0.0025 | NM_011821 | Gpc6          | glypican 6                                                   | 14 |
| 521 | 0.0025 | BC061169  | Slx           | Sycp3 like X-linked, ENSMUSG00000073257                      | X  |
| 522 | 0.0025 | NM_020572 | Aurkc         | aurora kinase C                                              | 7  |
| 523 | 0.0025 | BC057063  | Snx25         | sorting nexin 25                                             | 8  |
| 524 | 0.0026 | NM_009529 | Slx           | Sycp3 like X-linked, ENSMUSG00000073257                      | X  |
| 525 | 0.0026 | AK049494  | Flvcr2        | feline leukemia virus subgroup C cellular receptor family 2  | 12 |
| 526 | 0.0026 | NM_198677 | BC061237      | cDNA sequence BC061237                                       | 14 |
| 527 | 0.0026 | NM_011822 | Pigq          | phosphatidylinositol glycan anchor biosynthesis Q            | 17 |
| 528 | 0.0026 | NM_007609 | Casp4         | caspase 4, apoptosis-related cysteine peptidase              | 9  |
| 529 | 0.0026 | U16670    | U16670        | NA                                                           | X  |
| 530 | 0.0026 | AK044682  | Mpp4          | membrane protein, palmitoylated 4 (MAGUK p55)                | 1  |
| 531 | 0.0026 | AK029965  | AK029965      | NA                                                           | 3  |
| 532 | 0.0026 | M36514    | Zfp26         | zinc finger protein 26                                       | 9  |
| 533 | 0.0026 | U16670    | U16670        | NA                                                           | 11 |
| 534 | 0.0026 | AK045941  | L1Md-Tf29     | L1 repeat, Tf subfamily, member 29                           | NA |
| 535 | 0.0026 | NM_146431 | Olfr1510      | olfactory receptor 1510                                      | 14 |
| 536 | 0.0026 | U16672    | L1Md-A1       | L1 repeat, A subfamily, member 1                             | 7  |
| 537 | 0.0026 | BC021493  | Kti12         | KTI12 homolog, chromatin associated ( <i>S. cerevisiae</i> ) | 4  |
| 538 | 0.0026 | BC030042  | EG545728      | predicted gene, EG545728                                     | 5  |
| 539 | 0.0027 | NM_152803 | Hpse          | heparanase                                                   | 5  |
| 540 | 0.0027 | NM_146889 | Olfr1302      | olfactory receptor 1302                                      | 2  |
| 541 | 0.0027 | NM_173434 | 9930111J21Rik | RIKEN cDNA 9930111J21 gene                                   | 11 |
| 542 | 0.0028 | AK129178  | Akap11        | A kinase (PRKA) anchor protein 11                            | 14 |
| 543 | 0.0027 | BC056221  | Zfp583        | zinc finger protein 583                                      | 7  |
| 544 | 0.0027 | AK037032  | Cecr2         | cat eye syndrome chromosome region, candidate 2              | 6  |
| 545 | 0.0027 | AK003886  | Mrpl3         | mitochondrial ribosomal protein L3                           | 9  |
| 546 | 0.0027 | U16672    | L1Md-A1       | L1 repeat, A subfamily, member 1                             | 7  |
| 547 | 0.0028 | AK010217  | 2310079G19Rik | RIKEN cDNA 2310079G19 gene                                   | 16 |
| 548 | 0.0028 | NM_024172 | 1500019G21Rik | RIKEN cDNA 1500019G21 gene                                   | 7  |
| 549 | 0.0027 | U58494    | gag           | NA                                                           | NA |
| 550 | 0.0027 | NM_172759 | Ces5          | carboxylesterase 5                                           | 8  |
| 551 | 0.0027 | U10341    | Akap4         | A kinase (PRKA) anchor protein 4                             | X  |
| 552 | 0.0027 | NM_025540 | Sln           | sarcolipin                                                   | 9  |
| 553 | 0.0027 | L04849    | Ssty2         | spermiogenesis specific transcript on the Y 2                | Y  |
| 554 | 0.0027 | AK040961  | Pi15          | peptidase inhibitor 15                                       | 1  |
| 555 | 0.0027 | NM_009529 | Slx           | Sycp3 like X-linked, ENSMUSG00000073257                      | X  |
| 556 | 0.0027 | U16670    | U16670        | NA                                                           | NA |
| 557 | 0.0028 | AK008189  | Gsta4         | glutathione S-transferase, alpha 4                           | 9  |
| 558 | 0.0028 | AK045941  | L1Md-Tf29     | L1 repeat, Tf subfamily, member 29                           | NA |

|     |        |              |               |                                                              |    |
|-----|--------|--------------|---------------|--------------------------------------------------------------|----|
| 559 | 0.0028 | NM_008331    | Ifit1         | interferon-induced protein with tetratricopeptide repeats 1  | 19 |
| 560 | 0.0029 | NM_023524    | Tfpt          | TCF3 (E2A) fusion partner                                    | 7  |
| 561 | 0.0029 | AY512910     | AY512910      | predicted gene, ENSMUSG00000068680                           | 14 |
| 562 | 0.0029 | BC029023     | Trrap         | transformation/transcription domain-associated protein       | 5  |
| 563 | 0.0029 | NM_008645    | Mug1          | murinoglobulin 1                                             | 6  |
| 564 | 0.0029 | NM_207162    | LOC382133     | similar to RIKEN cDNA 1700029H17                             | Y  |
| 565 | 0.0029 | M55219       | M55219        | NA                                                           | NA |
| 566 | 0.0029 | NM_054074    | Defb6         | defensin beta 6                                              | 8  |
| 567 | 0.0029 | AK049265     | Frs2          | fibroblast growth factor receptor substrate 2                | 10 |
| 568 | 0.0029 | BC061169     | Slx           | Sycp3 like X-linked, ENSMUSG00000073257                      | X  |
| 569 | 0.0029 | AK083524     | LOC280487     | pol polyprotein                                              | 13 |
| 570 | 0.003  | NM_001002779 | A230065C20Rik | NA                                                           | 14 |
| 571 | 0.003  | U16670       | U16670        | NA                                                           | 8  |
| 572 | 0.003  | X16670       | LOC280487     | pol polyprotein                                              | 13 |
| 573 | 0.003  | NM_177397    | Atp6v1g3      | ATPase, H <sup>+</sup> transporting, lysosomal V1 subunit G3 | 1  |
| 574 | 0.003  | NM_025914    | Actr6         | ARP6 actin-related protein 6 homolog (yeast)                 | 10 |
| 575 | 0.003  | AK036232     | D12ErtD553e   | DNA segment, Chr 12, ERATO Doi 553, expressed                | 12 |
| 576 | 0.003  | AK028427     | Zfp346        | zinc finger protein 346                                      | 13 |
| 577 | 0.0031 | AK016661     | 4933405D12Rik | RIKEN cDNA 4933405D12 gene                                   | 3  |
| 578 | 0.0031 | AK076353     | 4732457N14    | hypothetical protein 4732457N14                              | 5  |
| 579 | 0.0031 | NM_031188    | Mup1          | major urinary protein 1                                      | 4  |
| 580 | 0.0031 | AK122436     | Camsap111     | calmodulin regulated spectrin-associated protein 1-like 1    | 1  |
| 581 | 0.0031 | NM_009529    | Slx           | Sycp3 like X-linked, ENSMUSG00000073257                      | X  |
| 582 | 0.0031 | NM_175322    | D130072O21Rik | NA                                                           | 8  |
| 583 | 0.0031 | AK045941     | L1Md-Tf29     | L1 repeat, Tf subfamily, member 29                           | NA |
| 584 | 0.0031 | NM_020278    | Lgi1          | leucine-rich repeat LGI family, member 1                     | 19 |
| 585 | 0.0031 | AY512924     | EG545510      | predicted gene, EG545510                                     | 3  |
| 586 | 0.0031 | NM_011999    | Clec4a2       | C-type lectin domain family 4, member a2                     | 6  |
| 587 | 0.0032 | NM_146931    | Olf796        | olfactory receptor 796                                       | 10 |
| 588 | 0.0031 | BC042938     | Ang4          | angiogenin, ribonuclease A family, member 4                  | 14 |
| 589 | 0.0031 | NM_138593    | Larp7         | La ribonucleoprotein domain family, member 7                 | 3  |
| 590 | 0.0032 | NM_011300    | Rps7          | ribosomal protein S7                                         | 12 |
| 591 | 0.0032 | AK013259     | Mup1          | major urinary protein 1                                      | 4  |
| 592 | 0.0032 | AK089801     | Cd69          | CD69 antigen                                                 | 6  |
| 593 | 0.0032 | AY196960     | Mageb2        | melanoma antigen, family B, 2                                | X  |
| 594 | 0.0032 | AK045941     | L1Md-Tf29     | L1 repeat, Tf subfamily, member 29                           | NA |
| 595 | 0.0032 | NM_178248    | Pramel4       | NA                                                           | NA |
| 596 | 0.0032 | NM_009596    | Abpa          | androgen binding protein alpha                               | 7  |
| 597 | 0.0032 | L04852       | Ssty2         | spermiogenesis specific transcript on the Y 2                | Y  |
| 598 | 0.0032 | U16672       | L1Md-A1       | L1 repeat, A subfamily, member 1                             | 7  |
| 599 | 0.0033 | NM_054041    | Antxr1        | anthrax toxin receptor 1                                     | 6  |
| 600 | 0.0032 | AK078386     | Ei24          | etoposide induced 2.4 mRNA                                   | 9  |
| 601 | 0.0033 | BC028949     | EG668383      | predicted gene, EG668383                                     | 12 |
| 602 | 0.0033 | NM_028058    | Fundc1        | FUN14 domain containing 1                                    | X  |
| 603 | 0.0033 | AK002444     | 0610010B08Rik | RIKEN cDNA 0610010B08 gene                                   | 2  |
| 604 | 0.0033 | NM_172547    | 9130014G24Rik | RIKEN cDNA 9130014G24 gene                                   | 10 |
| 605 | 0.0033 | AK004375     | Abhd13        | abhydrolase domain containing 13                             | 8  |
| 606 | 0.0033 | NM_198011    | E430018J23Rik | RIKEN cDNA E430018J23 gene                                   | 7  |
| 607 | 0.0033 | AK010171     | Bxdc2         | brix domain containing 2                                     | 15 |
| 608 | 0.0033 | BC006770     | BC006770      | NA                                                           | NA |
| 609 | 0.0034 | BC050791     | 1700019M22Rik | RIKEN cDNA 1700019M22 gene                                   | 12 |



|     |        |              |               |                                                         |    |
|-----|--------|--------------|---------------|---------------------------------------------------------|----|
| 610 | 0.0034 | U16672       | L1Md-A1       | L1 repeat, A subfamily, member 1                        | 7  |
| 611 | 0.0034 | AK009856     | Hif1an        | hypoxia-inducible factor 1, alpha subunit inhibitor     | 19 |
| 612 | 0.0034 | BC066831     | Ars2          | arsenate resistance protein 2                           | 5  |
| 613 | 0.0034 | AK054306     | Serinc3       | serine incorporator 3                                   | 2  |
| 614 | 0.0034 | NM_013488    | Cd4           | CD4 antigen                                             | 6  |
| 615 | 0.0034 | BC061152     | Cyp2d40       | cytochrome P450, family 2, subfamily d, polypeptide 40  | 15 |
| 616 | 0.0034 | AK035553     | Herc1         | hect domain and RCC1 (CHC1)-like domain (RLD) 1         | 9  |
| 617 | 0.0035 | NM_020264    | Svs7          | seminal vesicle secretory protein 7                     | 9  |
| 618 | 0.0035 | AK080305     | Cul5          | cullin 5                                                | 9  |
| 619 | 0.0035 | BC061106     | Taf1a         | TATA box binding protein associated factor, RNA pol I A | 1  |
| 620 | 0.0035 | AK015144     | 4930415F15Rik | RIKEN cDNA 4930415F15 gene                              | 11 |
| 621 | 0.0035 | NM_153800    | Arhgap22      | Rho GTPase activating protein 22                        | 14 |
| 622 | 0.0035 | NM_198033    | Setx          | senataxin                                               | 2  |
| 623 | 0.0035 | NM_053112    | Ear10         | eosinophil-associated, ribonuclease A family, member 10 | 14 |
| 624 | 0.0036 | NM_008352    | Il12b         | interleukin 12b                                         | 11 |
| 625 | 0.0035 | BC049586     | LOC382133     | similar to RIKEN cDNA 1700029H17                        | Y  |
| 626 | 0.0035 | NM_031188    | Mup1          | major urinary protein 1                                 | 4  |
| 627 | 0.0036 | NM_026649    | 4930441O14Rik | RIKEN cDNA 4930441O14 gene                              | 13 |
| 628 | 0.0036 | NM_175693    | B230220N19Rik | NA                                                      | NA |
| 629 | 0.0036 | NM_001001335 | Plekha8       | pleckstrin homology domain containing, family A 8       | 6  |
| 630 | 0.0036 | BC006775     | Rif           | rearranged L-myc fusion sequence                        | 4  |
| 631 | 0.0036 | AK076593     | 4930467E23Rik | RIKEN cDNA 4930467E23 gene                              | 8  |
| 632 | 0.0036 | AK013166     | 2810426N06Rik | RIKEN cDNA 2810426N06 gene                              | 7  |
| 633 | 0.0036 | BC004690     | Cep290        | centrosomal protein 290                                 | 10 |
| 634 | 0.0036 | NM_172448    | Rnf43         | ring finger protein 43                                  | 11 |
| 635 | 0.0037 | AK045649     | Herc1         | hect domain and RCC1 (CHC1)-like domain (RLD) 1         | 9  |
| 636 | 0.0037 | AK006494     | Ssty2         | spermiogenesis specific transcript on the Y 2           | Y  |
| 637 | 0.0037 | U16672       | L1Md-A1       | L1 repeat, A subfamily, member 1                        | 7  |
| 638 | 0.0037 | AK002773     | Vnn1          | vanin 1                                                 | 10 |
| 639 | 0.0037 | BC055684     | Zfp445        | zinc finger protein 445                                 | 9  |
| 640 | 0.0037 | AK034651     | Tbc1d15       | TBC1 domain family, member 15                           | 10 |
| 641 | 0.0038 | NM_011295    | Rps12         | ribosomal protein S12                                   | 10 |
| 642 | 0.0038 | AK045941     | L1Md-Tf29     | L1 repeat, Tf subfamily, member 29                      | NA |
| 643 | 0.0038 | NM_009529    | Slx           | Sycp3 like X-linked, ENSMUSG00000073257                 | X  |
| 644 | 0.0038 | U16670       | U16670        | NA                                                      | NA |
| 645 | 0.0038 | NM_008741    | Nsg2          | neuron specific gene family member 2                    | 11 |
| 646 | 0.0039 | AK086722     | Map2k6        | mitogen activated protein kinase kinase 6               | 11 |
| 647 | 0.0039 | NM_011082    | Pigr          | polymeric immunoglobulin receptor                       | 1  |
| 648 | 0.0038 | U16670       | U16670        | NA                                                      | X  |
| 649 | 0.0039 | AK122531     | 5830417110Rik | RIKEN cDNA 5830417110 gene                              | 3  |
| 650 | 0.0039 | U16670       | U16670        | NA                                                      | 9  |
| 651 | 0.0039 | BC049626     | Sly           | Sycp3 like Y-linked                                     | Y  |
| 652 | 0.0039 | NM_008089    | Gata1         | GATA binding protein 1                                  | X  |
| 653 | 0.0039 | NM_009260    | Spnb2         | spectrin beta 2                                         | 11 |
| 654 | 0.004  | AK081107     | AK081107      | predicted gene, ENSMUSG00000055849                      | 13 |
| 655 | 0.004  | U16672       | L1Md-A1       | L1 repeat, A subfamily, member 1                        | 7  |
| 656 | 0.004  | AK084162     | Cblb          | Casitas B-lineage lymphoma b                            | 16 |
| 657 | 0.004  | NM_207162    | LOC382133     | similar to RIKEN cDNA 1700029H17                        | Y  |
| 658 | 0.004  | NM_019746    | Pdcd5         | programmed cell death 5                                 | 7  |
| 659 | 0.004  | AK045941     | L1Md-Tf29     | L1 repeat, Tf subfamily, member 29                      | NA |
| 660 | 0.0041 | NM_023662    | Pcm1          | pericentriolar material 1                               | 8  |

|     |        |           |               |                                                      |    |
|-----|--------|-----------|---------------|------------------------------------------------------|----|
| 661 | 0.0041 | BC064813  | Inpp4b        | inositol polyphosphate-4-phosphatase, type II        | 8  |
| 662 | 0.0041 | BC023707  | Zc3h13        | zinc finger CCCH type containing 13                  | 14 |
| 663 | 0.0041 | AK017232  | Ttc18         | tetratricopeptide repeat domain 18                   | 14 |
| 664 | 0.0041 | NM_183190 | Ms4a5         | membrane-spanning 4-domains A 5                      | 19 |
| 665 | 0.0041 | NM_029842 | Jmjd5         | jumonji domain containing 5                          | 7  |
| 666 | 0.0041 | AK039310  | AK039310      | predicted gene, ENSMUSG00000052663                   | 19 |
| 667 | 0.0041 | AK030890  | Stau1         | staufen (RNA binding protein) homolog 1              | 2  |
| 668 | 0.0041 | U16672    | L1Md-A1       | L1 repeat, A subfamily, member 1                     | 7  |
| 669 | 0.0041 | AK051942  | LOC433461     | hypothetical gene supported by AK051942              | 2  |
| 670 | 0.0041 | NM_207227 | Olfr1373      | olfactory receptor 1373                              | 11 |
| 671 | 0.0041 | AK006494  | Ssty2         | spermiogenesis specific transcript on the Y 2        | Y  |
| 672 | 0.0042 | NM_178697 | Clca5         | chloride channel calcium activated 5                 | 3  |
| 673 | 0.0042 | NM_178050 | Arl6ip2       | ADP-ribosylation factor-like 6 interacting protein 2 | 17 |
| 674 | 0.0042 | AK028528  | Srpk2         | serine/arginine-rich protein specific kinase 2       | 5  |
| 675 | 0.0042 | NM_019940 | Zfp111        | zinc finger protein 111                              | 7  |
| 676 | 0.0042 | BC059715  | 1700010D01Rik | RIKEN cDNA 1700010D01 gene                           | X  |
| 677 | 0.0042 | AK045941  | L1Md-Tf29     | L1 repeat, Tf subfamily, member 29                   | NA |
| 678 | 0.0042 | NM_023289 | Ceacam11      | CEA-related cell adhesion molecule 11                | 7  |
| 679 | 0.0042 | NM_146955 | Olfr60        | olfactory receptor 60                                | 7  |
| 680 | 0.0043 | BC056476  | E130319B15Rik | RIKEN cDNA E130319B15 gene                           | 2  |
| 681 | 0.0043 | U16672    | L1Md-A1       | L1 repeat, A subfamily, member 1                     | 7  |
| 682 | 0.0043 | BC023501  | Fastkd1       | FAST kinase domains 1                                | 2  |
| 683 | 0.0043 | NM_008412 | Ivl           | involucrin                                           | 3  |
| 684 | 0.0043 | AK042925  | Ebf1          | early B-cell factor 1                                | 11 |
| 685 | 0.0043 | NM_008372 | Il7r          | interleukin 7 receptor                               | 15 |
| 686 | 0.0043 | NM_181412 | Zbed4         | zinc finger, BED domain containing 4                 | 15 |
| 687 | 0.0044 | U16670    | U16670        | NA                                                   | 2  |
| 688 | 0.0044 | AK045941  | L1Md-Tf29     | L1 repeat, Tf subfamily, member 29                   | NA |
| 689 | 0.0044 | NM_011887 | Scn11a        | sodium channel, voltage-gated, type XI, alpha        | 9  |
| 690 | 0.0044 | AK044024  | Eml5          | echinoderm microtubule associated protein like 5     | 12 |
| 691 | 0.0044 | BC040459  | Ahnak         | AHNAK nucleoprotein (desmoyokin)                     | 19 |
| 692 | 0.0044 | AK014581  | D19Ert652e    | DNA segment, Chr 19, ERATO Doi 652, expressed        | 19 |
| 693 | 0.0044 | BC068018  | Zfp654        | zinc finger protein 654                              | 16 |
| 694 | 0.0044 | NM_153524 | Mrgpra4       | MAS-related GPR, member A4                           | 7  |
| 695 | 0.0044 | BC027795  | Zfp294        | zinc finger protein 294                              | 16 |
| 696 | 0.0044 | NM_009230 | Soat1         | sterol O-acyltransferase 1                           | 1  |
| 697 | 0.0045 | AK008249  | Mnat1         | menage a trois 1                                     | 12 |
| 698 | 0.0044 | U16672    | L1Md-A1       | L1 repeat, A subfamily, member 1                     | 7  |
| 699 | 0.0045 | AK004123  | Zmym1         | zinc finger, MYM domain containing 1                 | 4  |
| 700 | 0.0045 | NM_146515 | Olfr99        | olfactory receptor 99                                | 17 |
| 701 | 0.0045 | AY040842  | 5830417110Rik | RIKEN cDNA 5830417110 gene                           | 3  |
| 702 | 0.0045 | AK049464  | Ranbp2        | RAN binding protein 2                                | 10 |
| 703 | 0.0045 | AK020456  | 9430034F23Rik | RIKEN cDNA 9430034F23 gene                           | 11 |
| 704 | 0.0045 | AK078437  | Psmb6         | proteasome (prosome, macropain) subunit, beta 6      | 11 |
| 705 | 0.0045 | AK122576  | Negr1         | neuronal growth regulator 1                          | 3  |
| 706 | 0.0045 | NM_147094 | Olfr606       | olfactory receptor 606                               | 7  |
| 707 | 0.0045 | AK021168  | Pkp4          | plakophilin 4                                        | 2  |
| 708 | 0.0045 | NM_011312 | S100a5        | S100 calcium binding protein A5                      | 3  |
| 709 | 0.0046 | U96708    | Serpib9f      | serine (or cysteine) peptidase inhibitor B 9f        | 13 |
| 710 | 0.0046 | AK036156  | AK036156      | NA                                                   | 7  |
| 711 | 0.0045 | AB005909  | Dmbt1         | deleted in malignant brain tumors 1                  | 7  |

|     |        |           |               |                                                        |    |
|-----|--------|-----------|---------------|--------------------------------------------------------|----|
| 712 | 0.0046 | AJ278769  | Gphn          | gephyrin                                               | 12 |
| 713 | 0.0046 | AK037896  | AK037896      | NA                                                     | 13 |
| 714 | 0.0046 | AB010353  | Zkscan3       | zinc finger with KRAB and SCAN domains 3               | 13 |
| 715 | 0.0046 | AK006494  | Ssty2         | spermiogenesis specific transcript on the Y 2          | Y  |
| 716 | 0.0046 | AK006226  | 1700021O21Rik | RIKEN cDNA 1700021O21 gene                             | 5  |
| 717 | 0.0046 | AK035923  | Dennd4a       | DENN/MADD domain containing 4A                         | 9  |
| 718 | 0.0045 | NM_021713 | Myg1          | melanocyte proliferating gene 1                        | 15 |
| 719 | 0.0047 | NM_080844 | Serpinc1      | serine (or cysteine) peptidase inhibitor C 1           | 1  |
| 720 | 0.0047 | U16671    | U16671        | NA                                                     | 7  |
| 721 | 0.0047 | AK085082  | EG546150      | predicted gene, EG546150                               | 9  |
| 722 | 0.0047 | NM_017478 | Copg2         | coatomer protein complex, subunit gamma 2              | 6  |
| 723 | 0.0047 | NM_172740 | B230312I18Rik | NA                                                     | 7  |
| 724 | 0.0047 | BC027050  | Pde6c         | phosphodiesterase 6C, cGMP specific, cone, alpha prime | 19 |
| 725 | 0.0047 | NM_145707 | Obox3         | oocyte specific homeobox 3                             | 7  |
| 726 | 0.0047 | AF104414  | Lats1         | large tumor suppressor                                 | 10 |
| 727 | 0.0047 | AK005740  | 1700007N14Rik | RIKEN cDNA 1700007N14 gene                             | 14 |
| 728 | 0.0048 | AK049517  | Sgol1         | shugoshin-like 1 (S. pombe)                            | 17 |
| 729 | 0.0048 | D00315    | D00315        | NA                                                     | 4  |
| 730 | 0.0048 | BC027125  | 4932438A13Rik | RIKEN cDNA 4932438A13 gene                             | 3  |
| 731 | 0.0048 | NM_010382 | H2-Eb1        | histocompatibility 2, class II antigen E beta          | 17 |
| 732 | 0.0047 | NM_145597 | Tmem161a      | transmembrane protein 161A                             | 8  |
| 733 | 0.0048 | BC011285  | Mobk11b       | MOB1, Mps One Binder kinase activator-like 1B          | 6  |
| 734 | 0.0048 | NM_008430 | Kcnk1         | potassium channel, subfamily K, member 1               | 8  |
| 735 | 0.0049 | NM_177078 | Adrbk2        | adrenergic receptor kinase, beta 2                     | 5  |
| 736 | 0.0049 | AK045941  | L1Md-Tf29     | L1 repeat, Tf subfamily, member 29                     | NA |
| 737 | 0.0049 | AK014399  | Nrg3          | neuregulin 3                                           | 14 |
| 738 | 0.0049 | NM_199068 | Foxk1         | forkhead box K1                                        | 5  |
| 739 | 0.0049 | X16670    | LOC280487     | pol polyprotein                                        | 13 |
| 740 | 0.0049 | NM_172855 | Galnt5        | N-acetylgalactosaminyltransferase 5                    | 2  |
| 741 | 0.0049 | U16672    | L1Md-A1       | L1 repeat, A subfamily, member 1                       | 7  |
| 742 | 0.0049 | NM_183258 | 2610001J05Rik | NA                                                     | 6  |

<sup>a</sup>HSF1 target promoters found in all three replicates, ranked according to the average  $\log_2$ -ratios and P-value, <sup>b</sup>the P-value for each HSF2 target promoter. The data was filtered with P-value < 0.005, <sup>c</sup>gene identification number, <sup>d</sup>gene name abbreviation, <sup>e</sup>chromosomal locations derived from the publicly available annotation databases.

Supplemental table S2. The chromosomal distribution of HSF1 target genes.

| Chr. <sup>a</sup> | Pop. frac. <sup>b</sup> | Study frac. <sup>c</sup> | P-value <sup>d</sup> | e-score <sup>e</sup> |
|-------------------|-------------------------|--------------------------|----------------------|----------------------|
| 1                 | 1257                    | 22                       | 0.995322             | 1                    |
| 2                 | 1945                    | 32                       | 0.999827             | 1                    |
| 3                 | 1071                    | 33                       | 0.328743             | 1                    |
| 4                 | 1303                    | 27                       | 0.966413             | 1                    |
| 5                 | 1300                    | 31                       | 0.858821             | 1                    |
| 6                 | 1191                    | 35                       | 0.429999             | 1                    |
| 7                 | 2584                    | 88                       | 0.037674             | 0.829                |
| 8                 | 1101                    | 15                       | 0.999657             | 1                    |
| 9                 | 1273                    | 32                       | 0.778031             | 1                    |
| 10                | 1035                    | 26                       | 0.759112             | 1                    |
| 11                | 1663                    | 35                       | 0.975837             | 1                    |
| 12                | 730                     | 19                       | 0.675656             | 1                    |
| 13                | 925                     | 27                       | 0.459133             | 1                    |
| 14                | 787                     | 25                       | 0.302125             | 1                    |
| 15                | 839                     | 13                       | 0.994800             | 1                    |
| 16                | 700                     | 15                       | 0.892902             | 1                    |
| 17                | 1056                    | 27                       | 0.731179             | 1                    |
| 18                | 557                     | 9                        | 0.977227             | 1                    |
| 19                | 748                     | 15                       | 0.937602             | 1                    |
| X                 | 808                     | 28                       | 0.156774             | 1                    |
| Y                 | 105                     | 42                       | 2.06E-37             | 4.53E-36             |
| Un                | 3277                    | 146                      | 1.12E-08             | 2.46E-07             |

<sup>a</sup>Chromosome, <sup>b</sup>fraction of genes located on a certain chromosome, of the total number of genes on the array (26129), <sup>c</sup>fraction of HSF1 target genes located on a certain chromosome, of the total number of HSF1 target genes analyzed in this study (742, with a P-value < 0.005), <sup>d</sup>the probability of HSF1 occupancy on the promoters in each chromosome by random chance. <sup>e</sup>Bonferroni corrected P-value. Un indicates undefined chromosomal location.

Supplemental table S3. Common HSF1 and HSF2 target promoters.

| No. <sup>a</sup> | Gene ID <sup>b</sup> | Abbreviation <sup>c</sup>                                | HSF2 rank <sup>d</sup> | HSF1 rank <sup>d</sup> | Chr. <sup>e</sup> |
|------------------|----------------------|----------------------------------------------------------|------------------------|------------------------|-------------------|
| 1                | U16671               | NA                                                       | 149                    | 1                      | 6                 |
| 2                | L1Md-A1              | L1 repeat, A subfamily, member 1                         | 18                     | 2                      | 7                 |
| 3                | Obox1                | oocyte specific homeobox 1                               | 367                    | 3                      | 7                 |
| 4                | L1Md-Tf29            | L1 repeat, Tf subfamily, member 29                       | 5                      | 9                      | NA                |
| 5                | gag                  | NA                                                       | 108                    | 11                     | 4                 |
| 6                | U16670               | NA                                                       | 1                      | 22                     | 3                 |
| 7                | LOC280487            | pol polyprotein                                          | 27                     | 26                     | 13                |
| 8                | Fem1b                | feminization 1 homolog b (C. elegans)                    | 162                    | 31                     | 9                 |
| 9                | Gsdmc2               | gasdermin C2                                             | 142                    | 33                     | 15                |
| 10               | D830030K20Rik        | alpha28-takusan RIKEN cDNA D830030K20 gene               | 14                     | 50                     | 14                |
| 11               | Etohd2               | ethanol decreased 2                                      | 197                    | 52                     | 13                |
| 12               | Zc3h11a              | zinc finger CCCH type containing 11A                     | 535                    | 55                     | 1                 |
| 13               | AK082647             | NA                                                       | 498                    | 56                     | 2                 |
| 14               | Rfc2                 | replication factor C (activator 1) 2                     | 311                    | 68                     | 5                 |
| 15               | Erp27                | endoplasmic reticulum protein 27                         | 417                    | 70                     | 6                 |
| 16               | LOC435023            | similar to spermiogenesis specific transcript on the Y 2 | 23                     | 80                     | Y                 |
| 17               | Ssty2                | spermiogenesis specific transcript on the Y 2            | 32                     | 105                    | Y                 |
| 18               | Ugt1a1               | UDP glucuronosyltransferase 1 family, polypeptide A1     | 133                    | 143                    | 1                 |
| 19               | Tnnt1                | troponin T1, skeletal, slow                              | 492                    | 147                    | 7                 |
| 20               | BC022960             | cDNA sequence BC022960                                   | 98                     | 167                    | X                 |
| 21               | AY053456             | hypothetical protein, withdrawn                          | 79                     | 171                    | 2                 |
| 22               | LOC667118            | similar to Zinc finger BED domain containing protein 4   | 430                    | 182                    | 1                 |
| 23               | Nlrp4e               | NLR family, pyrin domain containing 4E                   | 153                    | 188                    | 7                 |
| 24               | Higd1b               | HIG1 domain family, member 1B                            | 505                    | 214                    | 11                |
| 25               | lpr                  | NA                                                       | 265                    | 241                    | 15                |
| 26               | Slx                  | predicted gene, ENSMUSG00000073257, Slx                  | 58                     | 292                    | X                 |
| 27               | 4933409K07Rik        | RIKEN cDNA 4933409K07 gene                               | 54                     | 300                    | 4                 |
| 28               | Idi2                 | isopentenyl-diphosphate delta isomerase 2                | 105                    | 305                    | 13                |
| 29               | P2ry14               | purinergic receptor P2Y, G-protein coupled, 14           | 217                    | 307                    | 3                 |
| 30               | 4930590J08Rik        | RIKEN cDNA 4930590J08 gene                               | 529                    | 312                    | 6                 |
| 31               | Olf1347              | olfactory receptor 1347                                  | 68                     | 320                    | 7                 |
| 32               | Olf160               | olfactory receptor 60                                    | 485                    | 367                    | 7                 |
| 33               | 1700049E17Rik        | NA                                                       | 198                    | 370                    | NA                |
| 34               | AY140895             | NA                                                       | 399                    | 371                    | NA                |
| 35               | Glyat                | glycine-N-acyltransferase                                | 515                    | 381                    | 19                |
| 36               | EG233164             | predicted gene, EG233164                                 | 231                    | 383                    | 7                 |
| 37               | M55219               | NA                                                       | 159                    | 410                    | NA                |
| 38               | AK088963             | predicted gene, ENSMUSG00000073624                       | 82                     | 448                    | 18                |
| 39               | Evi1                 | ecotropic viral integration site 1                       | 461                    | 454                    | 3                 |
| 40               | Spr2a                | small proline-rich protein 2A                            | 330                    | 476                    | 3                 |
| 41               | LOC72520             | hypothetical gene LOC72520                               | 487                    | 486                    | 2                 |
| 42               | NM_025940            | predicted gene, ENSMUSG00000063277                       | 103                    | 514                    | 14                |
| 43               | Aurkc                | aurora kinase C                                          | 84                     | 522                    | 7                 |
| 44               | BC061237             | cDNA sequence BC061237                                   | 109                    | 526                    | 14                |
| 45               | EG545728             | predicted gene, EG545728                                 | 39                     | 538                    | 5                 |
| 46               | 4933405D12Rik        | RIKEN cDNA 4933405D12 gene                               | 230                    | 577                    | 3                 |
| 47               | Ang4                 | angiogenin, ribonuclease A family, member 4              | 55                     | 587                    | 14                |
| 48               | Pramel4              | NA                                                       | 540                    | 595                    | NA                |
| 49               | EG668383             | predicted gene, EG668383                                 | 3                      | 601                    | 12                |
| 50               | 0610010B08Rik        | RIKEN cDNA 9130014G24 gene                               | 83                     | 603                    | 10                |

|    |               |                                                |     |     |    |
|----|---------------|------------------------------------------------|-----|-----|----|
| 51 | BC006770      | NA                                             | 48  | 608 | NA |
| 52 | 4930467E23Rik | RIKEN cDNA 4930467E23 gene                     | 30  | 631 | 8  |
| 53 | Sly           | Sycp3 like Y-linked                            | 22  | 651 | Y  |
| 54 | Ahnak         | AHNAK nucleoprotein (desmoyokin)               | 237 | 691 | 19 |
| 55 | Serpinb9f     | serine peptidase inhibitor, clade B, member 9f | 122 | 711 | 13 |

<sup>a</sup>Common HSF1 and HSF2 target promoters found in all three replicates, ranked according to the average log<sub>2</sub>-ratios and P-value, <sup>b</sup>gene name abbreviation <sup>c</sup>ranking of HSF1 target genes, <sup>d</sup>ranking of HSF2 target genes, <sup>e</sup>chromosomal locations derived from the publicly available annotation databases.
